# Supplementary material for: Paleoceanography and ice sheet variability offshore Wilkes Land, Antarctica – Part 2: Insights from Oligocene–Miocene dinoflagellate cyst assemblages
Source: Copernicus journal article supplement (doi:10.5194/cp-14-1015-2018), 2018-07-11
Supplement: Supplementary file 1 [file Raw counts.xls]

## Sheet: dinocyst counts
Leg	Site	Hole	Core	type	Section	half	Interval top	interval bottom	depth top	deth bottom	mid-depth	Weight	Lycobatch	Lycopodium	dc/gram	DC total	Lithology	Achilleodinium biformoides	Achomosphaera alcicornu	Adnatosphaeridium? sp.	Aiora fenestrata	Aireiana verrucosa	Adnatosphaeridium spp.	Alisocysta circumtabulata	Alterbidinium distinctum	Apectodinium spp.	Arachnodinium antarcticum	Areoligera cpx	Areoligera semicirculata	Ataxodinium spp.	Batiacasphaera compta	Batiacasphaera spp.	Batiacasphaera hirsuta	Batiacasphaera micropapillata	Batiacasphaera minuta	Batiacasphaera sphaerica	Batiacasphaera sp. A	Batiacasphaera sp. B	Batiacasphaera sp. C	Brigantedinium simplex	Brigantedinium pynei	Brigantedinium sp. A	Brigantedinium sp. B	Brigantedinium sp. C	Brigantedinium sp. D	Cerebrocysta WR small	Cerebrocysta delicata	Cerebrocysta sp. A	Cerebrocysta bartonensis
318	U1356	A	11	R	1	W	20	22	95.6	95.62	95.61	14.2013	20848	216	353.416	52	lamin diatom ooze													1			2							11
318	U1356	A	12	R	2	W	20	22	106.6	106.62	106.61	12.9878	20848	513	375.485	120	Grey silty clays diatom ooze													23			12		7	5				5
318	U1356	A	13	R	1	W	20	22	114.7	114.72	114.71	11.63	20848	500	25.0965	7	Grey silty clays diatom ooze
318	U1356	A	13	R	2	W	40	42	116.4	116.42	116.41	14.07	20848	500	130.393	44	Grey silty clays diatom ooze																2		3	2				1
318	U1356	A	14	R	1	W	20	22	124.3	124.32	124.31	14.7322	20848	500	0	0	Grey silty clays diatom ooze
318	U1356	A	14	R	3	W	20	22	127.3	127.32	127.31	8.77	20848	738	167.499	52	Grey silty clays diatom ooze													1			3		2	4				5	1
318	U1356	A	14	R	5	W	20	22	129.8	129.82	129.81	12.81	20848	744	148.748	68	lamin diatom ooze																1		2					17	13
318	U1356	A	15	R	2	W	20	22	135.5	135.52	135.51	7.134	20848	500	0	0	Grey silty clays diatom ooze
318	U1356	A	15	R	4	W	20	22	138.5	138.52	138.51	12.05	20848	586	126.955	43	Grey silty clays diatom ooze																	4	1					3	2
318	U1356	A	15	R	6	W	20	22	141	141.02	141.01	8.19	20848	780	234.973	72	lamin diatom ooze																							4	15
318	U1356	A	17	R	1	W	20	22	153.2	153.22	153.21	10.903	20848	500	118.552	31	lamin diatom ooze																1							10
318	U1356	A	17	R	3	W	20	22	156.2	156.22	156.21	10.01	20848	510	298.114	73	lamin diatom ooze																			1				16	4
318	U1356	A	18	R	3	W	21	23	165.71	165.73	165.72	11.4274	20848	513	241.829	68	lamin diatom ooze													2										11	4
318	U1356	A	19	R	2	W	20	22	173.8	173.82	173.81	9.3601	20848	500	124.73	28	Slump													3
318	U1356	A	19	R	3	W	20	22	175.3	175.32	175.31	9.68	20848	500	0	0	Slump
318	U1356	A	19	R	5	W	20	22	178.31	178.33	178.32	13.19	20848	852	155.833	84	Slump													5			2	2
318	U1356	A	20	R	2	W	20	22	183.4	183.42	183.41	8.3888	20848	732	145.99	43	Slump													5										14
318	U1356	A	21	R	2	W	20	22	193	193.02	193.01	10.97	20848	767	205.656	83	Slump																	3	8	1				13	10
318	U1356	A	22	R	2	W	20	22	202.6	202.62	202.61	7.7729	20848	785	95.6687	28	lamin diatom ooze																							5
318	U1356	A	24	R	2	W	20	22	221.51	221.53	221.52	7.6632	20848	617	74.958	17	lamin diatom ooze																							2	1
318	U1356	A	30	R	1	W	18	20	277.68	277.7	277.69	11.0514	20848	500	0	0	Slump
318	U1356	A	30	R	4	W	20	22	282.2	282.22	282.21	8.265	20848	1024	184.749	75	Grey silty clays diatom ooze			8															2	2					1
318	U1356	A	30	R	6	W	20	22	284.6	284.62	284.61	9.6029	20848	500	69.4723	16	Grey silty clays diatom ooze
318	U1356	A	34	R	1	W	27	29	316.17	316.19	316.18	6.8633	20848	838	489.352	135	lamin diatom ooze			2															28	4				5
318	U1356	A	34	R	4	W	20	22	320.1	320.12	320.11	8.2447	20848	390	564.085	87	lamin diatom ooze																1		12					16	12
318	U1356	A	35	R	2	W	20	22	327.2	327.22	327.21	9.28	20848	710	503.101	159	lamin diatom ooze																		46	1				42	16
318	U1356	A	35	R	4	W	20	22	330.2	330.22	330.21	13.7898	20848	500	0	0	lamin diatom ooze
318	U1356	A	39	R	1	W	20	22	363.8	363.82	363.81	10.0361	20848	581	110.837	31	Grey silty clays diatom ooze																2
318	U1356	A	40	R	2	W	19	21	374.89	374.91	374.9	13.8455	20848	259	348.825	60	Grey silty clays diatom ooze																			4
318	U1356	A	42	R	2	W	20	22	393.9	393.92	393.91	13.9173	20848	310	454.23	94	Grey silty clays diatom ooze																		10	8				4
318	U1356	A	43	R	2	W	20	22	403.7	403.72	403.71	10.04	20848	957	175.753	81	Grey silty clays diatom ooze																		1	3
318	U1356	A	44	R	1	W	20	22	411.8	411.82	411.81	16.7081	20848	780	155.172	97	Grey silty clays diatom ooze																		7	11
318	U1356	A	45	R	1	W	10	14	421.3	421.34	421.32	10.556	20848	1873	75.9206	72	F2																		2					18			20		3
318	U1356	A	45	R	1	W	30	34	421.5	421.54	421.52	6.42	20848	1921	70.9988	42	Debris Flow																							22	2			1	4
318	U1356	A	45	R	1	W	40	44	421.6	421.64	421.62	14.113	20848	1898	41.2501	53	Debris Flow																							11	4		9		6
318	U1356	A	45	R	1	W	55	59	421.75	421.79	421.77	11.4119	20848	1151	131.737	83	Debris Flow															2								64	3				3
318	U1356	A	45	R	1	W	70	74	421.9	421.94	421.92	14.0727	20848	1949	103.375	136	Debris Flow																							51	1	3	8	1	11
318	U1356	A	45	R	1	W	82	86	422.02	422.06	422.04	8.1911	20848	1004	157.174	62	Debris Flow																						1	36	1	3			1	1
318	U1356	A	46	R	1	W	45	49	431.25	431.29	431.27	15.0676	20848	1522	102.727	113	Debris Flow																							3								2
318	U1356	A	46	R	1	W	68	72	431.48	431.52	431.5	13.9746	20848	2180	187.508	274	Debris Flow																	1						13								38
318	U1356	A	46	R	1	W	87	91	431.69	431.67	431.71	17.1166	20848	1306	96.0596	103	Debris Flow				1													1						17								10
318	U1356	A	46	R	1	W	120	124	432	432.04	432.02	17.3929	20848	2036	67.115	114	Debris Flow				1
318	U1356	A	46	R	2	W	16	20	432.4	432.44	432.42	16.3099	20848	1415	36.1341	40	Debris Flow
318	U1356	A	46	R	2	W	50	54	432.74	432.78	432.76	9.1459	20848	1755	61.0462	47	Debris Flow																													2
318	U1356	A	46	R	2	W	70	74	432.94	432.98	432.96	14.6691	20848	2453	61.9936	107	Debris Flow															1		3						1								3
318	U1356	A	46	R	2	W	90	94	433.14	433.18	433.16	13.2366	20848	1760	90.3851	101	Debris Flow																							36	3							1
318	U1356	A	46	R	2	W	144	148	433.68	433.72	433.7	7.249	20848	2112	69.4485	51	Debris Flow																	1														4
318	U1356	A	46	R	3	W	10	14	433.82	433.86	433.84	10.4177	20848	2385	186.276	222	Debris Flow																							7								6
318	U1356	A	46	R	3	W	19	21	433.9	433.94	433.92	14.4358	20848	1650	219.692	251	Debris Flow																															3
318	U1356	A	46	R	3	W	21	23	433.92	433.96	433.94	14.6942	20848	1325	133.848	125	Debris Flow								1									2														1
318	U1356	A	46	R	3	W	37	41	434.09	434.13	434.11	10.3478	20848	747	89.004	33	Debris Flow																							12	1				1			1
318	U1356	A	46	R	3	W	45	49	434.17	434.21	434.19	11.414	20848	1873	84.8414	87	Debris Flow																							9	1					1		3
318	U1356	A	47	R	1	W	21	25	440.61	440.65	440.63	16.0449	20848	1988	176.472	270	Debris Flow																	4						3						2		10
318	U1356	A	47	R	1	W	26	30	440.36	440.7	440.53	16.6172	20848	672	113.885	61	Debris Flow															1								2						1		2
318	U1356	A	47	R	1	W	45	49	440.85	440.89	440.87	13.1117	20848	2181	166.95	229	Debris Flow																	2						38		3				4		9
318	U1356	A	47	R	1	W	64	68	441.04	441.08	441.06	13.8503	20848	1956	122.358	159	Debris Flow										1																					8
318	U1356	A	47	R	1	W	68	72	441.08	441.12	441.1	10.2717	20848	2532	83.3665	104	Debris Flow																													2		3
318	U1356	A	47	R	1	W	70	74	441.1	441.14	441.12	14.7295	20848	2470	97.4156	170	Debris Flow																													7		4
318	U1356	A	47	R	1	W	135	139	441.75	441.79	441.77	13.9753	20848	1303	164.862	144	Debris Flow																		1											6		20
318	U1356	A	47	R	2	W	5	9	441.91	441.95	441.93	14.7284	20848	806	68.4918	39	Debris Flow																3	1						25	2
318	U1356	A	47	R	2	W	40	44	442.26	442.3	442.28	13.4148	20848	3347	66.3988	143	Debris Flow																							77	7	14						6
318	U1356	A	47	R	2	W	100	104	442.86	442.9	442.88	14.6661	20848	1398	91.5135	90	Debris Flow																							74	3							1
318	U1356	A	47	R	2	W	120	124	443.06	443.1	443.08	15.3808	20848	912	59.4498	40	Debris Flow																							34	1	1
318	U1356	A	47	R	2	W	135	139	443.21	443.25	443.23	15.6345	20848	500	0	0	Debris Flow
318	U1356	A	47	R	3	W	85	89	444.17	444.21	444.19	15.5514	20848	415	58.1459	18	carbonate															1								5								1
318	U1356	A	47	R	4	W	85	89	445.47	445.51	445.49	16.121	20848	999	84.1434	65	carbonate															3																2
318	U1356	A	48	R	1	W	5	9	449.95	449.99	449.97	15.8862	20848	543	534.118	221	Debris Flow																							76
318	U1356	A	48	R	2	W	128	132	452.68	452.72	452.7	15.3996	20848	497	623.784	229	Debris Flow															3								68								4
318	U1356	A	48	R	3	W	1	5	452.91	452.95	452.93	15.1882	20848	679	376.012	186	Debris Flow															2							2	98
318	U1356	A	49	R	1	W	10	13	459.5	459.53	459.515	17.872	20848	567	139.9	68	Debris Flow															1							1	20
318	U1356	A	50	R	1	W	24	30	469.24	469.3	469.27	17.0241	20848	999	210.845	172	Debris Flow															4							1	24						1
318	U1356	A	51	R	1	W	21	23	478.81	478.83	478.82	9.1196	20848	926	66.6563	27	Debris Flow																							5
318	U1356	A	51	R	2	W	18	20	480.28	480.3	480.29	17.0424	20848	806	132.044	87	Debris Flow															2								14						2
318	U1356	A	52	R	CC	W	9	13	488.29	488.33	488.31	16.9047	20848	671	332.669	181	Debris Flow																							77								1
318	U1356	A	53	R	2	W	20	22	499.45	499.47	499.46	10.7293	20848	747	325.149	125	Debris Flow																						1	78						1
318	U1356	A	53	R	2	W	84	88	500.09	500.13	500.11	10.7293	20848	732	116.798	44	Debris Flow																						2	23
318	U1356	A	54	R	1	W	20	22	507.6	507.62	507.61	17.3756	20848	655	86.0956	47	Debris Flow																							24								1
318	U1356	A	54	R	2	W	20	22	508.98	509	508.99	18.3809	20848	822	136.603	99	Debris Flow																							31								6
318	U1356	A	54	R	3	W	0	4	510.29	510.31	510.3	16.4701	20848	615	53.5139	26	Debris Flow																							14								4
318	U1356	A	55	R	1	W	18	20	517.18	517.2	517.19	15.1862	20848	885	72.9071	47	Debris Flow																													1		3
318	U1356	A	55	R	2	W	18	20	518.18	518.2	518.19	12.5388	20848	999	141.469	85	Debris Flow															1							8	16								3
318	U1356	A	57	R	1	W	21	23	536.01	536.03	536.02	18.1821	20848	716	179.36	112	Debris Flow															1								19
318	U1356	A	57	R	2	W	18	20	537.29	537.31	537.3	17.6093	20848	999	114.955	97	Debris Flow															1							5	17								22
318	U1356	A	58	R	1	W	19	21	545.59	545.61	545.6	18.8428	20848	788	234.482	167	Debris Flow																				30		13	10								1
318	U1356	A	59	R	1	W	17	19	555.17	555.19	555.18	19.9547	20848	603	171.529	99	Debris Flow						1																	54
318	U1356	A	60	R	1	W	18	20	564.78	564.8	564.79	16.9054	20848	500	0	0	Debris Flow
318	U1356	A	64	R	1	W	17	19	603.17	603.19	603.18	17.3616	20848	500			F2
318	U1356	A	66	R	2	W	18	20	623.98	624	623.99	9.8183	20848	107	3036.24	153	F2																						5	40
318	U1356	A	67	R	1	W	19	22	632.09	632.12	632.105	9.3162	20848	999	161.284	72	F1																							18
318	U1356	A	68	R	2	W	19	21	643.09	643.11	643.1	9.4146	20848	999	86.4493	39	F1																							20
318	U1356	A	68	R	4	W	16	18	645.72	645.74	645.73	9.6621	20848	500	17.2617	4	F2
318	U1356	A	68	R	6	W	17	19	647.91	647.93	647.92	9.5661	20848	500	47.946	11	F2
318	U1356	A	69	R	1	W	18	20	651.18	651.2	651.19	9.7227	20848	500	0	0	F2
318	U1356	A	69	R	3	W	19	21	653.85	653.87	653.86	9.5988	20848	500	60.8143	14	F1																						1	2
318	U1356	A	69	R	5	W	18	20	656.78	656.8	656.79	9.2219	20848	677	36.7323	11	F1															2							1
318	U1356	A	70	R	1	W	19	21	660.79	660.81	660.8	9.8553	20848	501	42.2238	10	F2															1								1
318	U1356	A	70	R	2	W	21	23	662.26	662.28	662.27	9.7756	20848	783	98.0532	36	F1																						1	27
318	U1356	A	71	R	1	W	17	19	670.37	670.39	670.38	9.5251	20848	821	93.3082	35	F1																							14	10
318	U1356	A	71	R	2	W	18	20	671.53	671.55	671.54	9.5965	20848	783	116.53	42	F2																						3	1
318	U1356	A	71	R	4	W	18	20	674.3	674.32	674.31	9.5956	20848	431	110.902	22	F2																						2	1
318	U1356	A	72	R	1	W	20	22	680	680.02	680.01	9.3372	20848	999	105.046	47	F1															2								24
318	U1356	A	72	R	3	W	18	20	682.8	682.82	682.81	9.7994	20848	750	141.832	50	F2															1							5	1
318	U1356	A	72	R	5	W	18	20	685.42	685.44	685.43	9.3881	20848	814	207.337	76	F1															1							4	16
318	U1356	A	73	R	1	W	18	20	689.58	689.6	689.59	8.9192	20848	516	1377.09	304	F1															4								93
318	U1356	A	73	R	4	W	18	20	693.85	693.87	693.86	9.5698	20848	721	54.3875	18	F2															1								4
318	U1356	A	75	R	2	W	18	20	710.12	710.14	710.13	9.8116	20848	500	16.9987	4	slump
318	U1356	A	75	R	3	W	18	20	711.55	711.57	711.56	9.867	20848	706	329.206	110	slump																							25
318	U1356	A	76	R	2	W	20	22	719.64	719.66	719.65	9.4712	20848	635	447.173	129	slump						1																	26
318	U1356	A	76	R	4	W	18	20	722.37	722.39	722.38	9.6336	20848	383	45.203	8	slump																							2
318	U1356	A	76	R	5	W	31	33	723.88	723.9	723.89	9.56	20848	614	227.31	64	F2																						2	9
318	U1356	A	77	R	CC	W	24	26	728.27	728.29	728.28	9.6219	20848	999	221.227	102	slump																							25
318	U1356	A	78	R	2	W	20	22	739.04	739.06	739.05	9.5036	20848	999	149.321	68	F2																							1						1	5
318	U1356	A	78	R	4	W	20	23	741.44	741.47	741.455	9.3178	20848	919	365.197	150	F2																					1	5	18							1
318	U1356	A	79	R	1	W	18	20	747.18	747.2	747.19	9.6152	20848	999	65.1121	30	F2		1
318	U1356	A	79	R	4	W	18	20	751.54	751.56	751.55	9.8035	20848	634	315.298	94	F2																					11		3
318	U1356	A	79	R	5	W	15	18	753	753.03	753.015	9.5512	20848	500	13.0966	3	F2
318	U1356	A	82	R	1	W	80	84	776.6	776.64	776.62	9.3419	20848	525	454.835	107	F1																						3	40
318	U1356	A	82	R	2	W	40	44	777.6	777.64	777.62	9.3616	20848	740	502.573	167	F1																							111
318	U1356	A	82	R	3	W	40	44	778.94	778.98	778.96	9.474	20848	766	338.988	118	F1															1							1	88
318	U1356	A	82	R	4	W	40	44	780.28	780.32	780.3	9.019	20848	905	393.349	154	F1																							96	1	3
318	U1356	A	82	R	5	W	40	44	781.52	781.56	781.54	9.4885	20848	538	151.108	37	F2																							6
318	U1356	A	82	R	6	W	40	44	782.7	782.74	782.72	9.2629	20848	354	95.3686	15	F2																						1
318	U1356	A	83	R	1	W	33	36	785.83	785.86	785.845	9.1732	20848	500	27.2725	6	F1
318	U1356	A	84	R	1	W	5	9	795.15	795.19	795.17	15.0094	20848	977	261.592	184	F1																							100
318	U1356	A	84	R	1	W	20	24	795.3	795.34	795.32	14.1603	20848	372	51.4508	13	slump																							5
318	U1356	A	84	R	1	W	44	48	795.54	795.58	795.56	9.0864	20848	477	870.628	181	slump																				3		23	32
318	U1356	A	84	R	1	W	61	65	795.71	795.75	795.73	14.5037	20848	589	539.34	221	slump																							121
318	U1356	A	84	R	1	W	79	83	795.89	795.93	795.91	14.1988	20848	616	545.843	229	slump																							139
318	U1356	A	84	R	1	W	100	104	796.1	796.14	796.12	14.3701	20848	1690	113.316	132	slump															2								33
318	U1356	A	84	R	1	W	120	124	796.3	796.34	796.32	14.3116	20848	308	411.476	87	slump																							62
318	U1356	A	84	R	2	W	2	6	796.51	796.55	796.53	14.464	20848	516	525.151	188	slump															3					2			90		8
318	U1356	A	84	R	2	W	18	22	796.67	796.71	796.69	14.4916	20848	808	382.803	215	slump							1								2					1			110		22
318	U1356	A	84	R	2	W	39	43	796.88	796.92	796.9	9.509	20848	513	854.756	200	slump															2								22						1	1
318	U1356	A	84	R	2	W	61	65	797.1	797.14	797.12	14.9363	20848	970	116.556	81	slump															1								32
318	U1356	A	84	R	2	W	80	84	797.29	797.33	797.31	14.5009	20848	301	735.569	154	slump															3								102		2
318	U1356	A	84	R	2	W	100	104	797.49	797.53	797.51	14.5888	20848	444	946.257	294	slump																							168
318	U1356	A	84	R	2	W	120	124	797.69	797.73	797.71	10.2761	20848	608	850.889	255	slump															3								116		1
318	U1356	A	84	R	2	W	140	144	797.89	797.93	797.91	13.0311	20848	563	775.778	273	slump															4								122
318	U1356	A	84	R	3	W	0	4	798	798.04	798.02	12.4464	20848	750	247.903	111	slump																							65
318	U1356	A	84	R	3	W	19	23	798.19	798.23	798.21	11.5213	20848	987	218.169	119	slump																							59
318	U1356	A	84	R	3	W	38	42	798.38	798.42	798.4	8.8481	20848	510	180.181	39	slump															1								11
318	U1356	A	84	R	3	W	60	64	798.6	798.64	798.62	11.8642	20848	464	988.436	261	slump																							118
318	U1356	A	84	R	3	W	100	104	799	799.04	799.02	11.8891	20848	657	723.301	271	slump																							171		2
318	U1356	A	84	R	3	W	120	124	799.2	799.24	799.22	12.5058	20848	741	548.94	244	slump																							108
318	U1356	A	84	R	3	W	140	144	799.4	799.44	799.42	9.5067	20848	1314	580.789	348	slump																							85
318	U1356	A	84	R	4	W	0	4	799.49	799.53	799.51	10.1351	20848	658	881.576	282	slump															1								148
318	U1356	A	84	R	4	W	20	24	799.69	799.73	799.71	10.5669	20848	1183	270.176	162	slump																							88
318	U1356	A	84	R	4	W	40	44	799.89	799.93	799.91	8.9859	20848	704	346.035	105	slump															3					2		1	28
318	U1356	A	84	R	4	W	59	63	800.08	800.12	800.1	10.1128	20848	1548	179.786	135	slump																							67		1				1
318	U1356	A	84	R	4	W	80	84	800.29	800.33	800.31	11.1128	20848	382	952.751	194	slump																							16
318	U1356	A	84	R	4	W	100	104	800.49	800.53	800.51	9.8376	20848	673	733.696	233	slump																							35
318	U1356	A	84	R	4	W	120	124	800.69	800.73	800.71	12.2158	20848	543	763.746	243	slump																							39
318	U1356	A	84	R	4	W	140	144	800.89	800.93	800.91	13.8752	20848	647	524.843	226	slump		1																					82
318	U1356	A	84	R	5	W	0	4	800.99	801.03	801.01	11.9156	20848	1222	325.015	227	F2		1																		1			76
318	U1356	A	84	R	5	W	20	24	801.19	801.23	801.21	18.096	20848	231	1072.28	215	F2																							18
318	U1356	A	84	R	5	W	40	44	801.39	801.43	801.41	9.421	20848	429	995.56	193	F2															1					2			13
318	U1356	A	84	R	5	W	59	63	801.58	801.62	801.6	12.164	20848	485	805.714	228	F2																							56
318	U1356	A	84	R	5	W	80	84	801.79	801.83	801.81	12.1416	20848	412	1116.93	268	F2																							64
318	U1356	A	84	R	5	W	100	104	801.99	802.03	802.01	12.0219	20848	382	1103.15	243	F2															2								71		1
318	U1356	A	84	R	5	W	120	124	802.19	802.23	802.21	12.8031	20848	329	1257.15	254	F2																							66		2
318	U1356	A	84	R	5	W	140	144	802.39	802.43	802.41	14.7093	20848	710	554.956	278	carbonate										1										9			80
318	U1356	A	84	R	6	W	0	4	802.47	802.51	802.49	19.7529	20848	514	599.588	292	carbonate		1																					7									3
318	U1356	A	84	R	6	W	20	24	802.67	802.71	802.69	13.3613	20848	631	769.036	311	F2											1												51
318	U1356	A	84	R	6	W	40	44	802.87	802.91	802.89	9.1664	20848	294	1725.14	223	F2																					5		23							1
318	U1356	A	84	R	6	W	59	63	803.06	803.1	803.08	12.6898	20848	535	881.328	287	F2																							75
318	U1356	A	84	R	6	W	80	84	803.27	803.31	803.29	19.7948	20848	557	489.731	259	carbonate																							63
318	U1356	A	84	R	6	W	100	104	803.47	803.51	803.49	15.9785	20848	332	1033.58	263	carbonate																							47
318	U1356	A	84	R	7	W	0	4	803.58	803.62	803.6	16.3295	20848	284	1177.81	262	F2		1													1								50
318	U1356	A	84	R	7	W	20	24	803.78	803.82	803.8	14.8971	20848	492	731.022	257	F2															1								35
318	U1356	A	84	R	7	W	40	44	803.98	804.02	804	9.3853	20848	656	643.378	190	F2															3						4		48
318	U1356	A	84	R	7	W	60	64	804.18	804.22	804.2	12.4209	20848	912	428.817	233	slump															2								47		1
318	U1356	A	85	R	1	W	20	24	804.9	804.94	804.92	14.144	20848	1003	129.322	88	F2																							33		2
318	U1356	A	85	R	1	W	40	44	805.1	805.14	805.12	9.7571	20848	500	0	0	F2
318	U1356	A	85	R	1	W	60	64	805.3	805.34	805.32	13.5576	20848	904	49.33	29	F2										1
318	U1356	A	85	R	1	W	80	84	805.5	805.54	805.52	11.8421	20848	1625	173.341	160	F1															1								59		7
318	U1356	A	85	R	1	W	100	104	805.7	805.74	805.72	10.2683	20848	1317	66.2901	43	F2
318	U1356	A	85	R	1	W	119	123	805.89	805.93	805.91	11.3737	20848	557	13.1634	4	F1
318	U1356	A	85	R	2	W	0	4	805.98	806.02	806	14.4753	20848	1307	40.7721	37	F1															1								14		2
318	U1356	A	85	R	2	W	20	24	806.18	806.22	806.2	13.4381	20848	793	428.447	219	F1																							144		6
318	U1356	A	85	R	2	W	43	47	806.41	806.45	806.43	9.1452	20848	163	3538.38	253	F1															1								69		3
318	U1356	A	85	R	2	W	56	60	806.54	806.58	806.56	16.2178	20848	550	556.271	238	F1																							151		25
318	U1356	A	85	R	2	W	96	100	806.94	806.98	806.96	14.5044	20848	220	1489.62	228	F1																							160		23
318	U1356	A	85	R	3	W	0	4	806.99	807.03	807.01	11.1197	20848	300	1274.91	204	F1																							135		5
318	U1356	A	85	R	3	W	20	24	807.19	807.23	807.21	18.0883	20848	200	1613.6	280	slump															3								180		10
318	U1356	A	85	R	3	W	40	44	807.39	807.43	807.41	9.0458	20848	317	1235.97	170	slump										1													73		4
318	U1356	A	85	R	3	W	60	64	807.59	807.63	807.61	15.5349	20848	167	2129.54	265	F2																							147		33
318	U1356	A	85	R	3	W	80	84	807.79	807.83	807.81	17.1874	20848	145	2032.79	243	F2															1								143		22
318	U1356	A	85	R	3	W	100	104	807.99	808.03	808.01	13.567	20848	295	1234.54	237	F2																							141		3
318	U1356	A	85	R	3	W	120	124	808.19	808.23	808.21	16.2619	20848	335	952.901	249	F2																							151		6
318	U1356	A	85	R	3	W	140	144	808.39	808.43	808.41	15.1776	20848	245	1872.59	334	F2																							112		9
318	U1356	A	85	R	4	W	0	4	808.49	808.53	808.51	13.8281	20848	407	1055.73	285	slump																							117		3
318	U1356	A	85	R	4	W	20	24	808.69	808.73	808.71	13.8309	20848	284	1385.28	261	slump															4								109		3
318	U1356	A	85	R	4	W	40	44	808.89	808.93	808.91	9.3388	20848	490	1075.2	236	slump															2								63		1
318	U1356	A	85	R	4	W	60	64	809.09	809.13	809.11	12.9503	20848	610	757.42	287	slump																				1			124		1
318	U1356	A	85	R	4	W	80	84	809.29	809.33	809.31	12.2432	20848	371	1124.51	245	slump																							119		1
318	U1356	A	85	R	4	W	100	104	809.49	809.53	809.51	15.3822	20848	335	999.305	247	slump																							142		2
318	U1356	A	85	R	4	W	121	125	809.7	809.74	809.72	12.1427	20848	516	838.494	252	slump																							121
318	U1356	A	85	R	4	W	140	144	809.89	809.93	809.91	14.009	20848	800	448.316	241	slump		1																					87		2
318	U1356	A	85	R	5	W	0	4	809.99	810.03	810.01	12.3056	20848	385	1170.53	266	slump																							184		3
318	U1356	A	85	R	5	W	20	24	810.19	810.23	810.21	19.4119	20848	434	633.5	256	slump																							123
318	U1356	A	85	R	5	W	39	46	810.38	810.45	810.415	9.2669	20848	969	564.173	243	slump																							47		1
318	U1356	A	85	R	5	W	57	61	810.56	810.6	810.58	14.1044	20848	694	577.191	271	slump																							169
318	U1356	A	85	R	5	W	80	84	810.79	810.83	810.81	13.2255	20848	691	570.314	250	slump																				1			118		3
318	U1356	A	85	R	5	W	100	104	810.99	811.03	811.01	19.5427	20848	510	506.203	242	slump															2							2	78		4
318	U1356	A	86	R	1	W	40	44	814.7	814.74	814.72	9.3251	20848	537	591.187	142	slump								1															30
318	U1356	A	86	R	2	W	40	44	816.18	816.22	816.2	8.7558	20848	603	323.791	82	F1																						1	8						1
318	U1356	A	86	R	3	W	40	44	817.39	817.43	817.41	8.8347	20848	500	18.8783	4	slump
318	U1356	A	86	R	4	W	40	44	818.38	818.42	818.4	9.1531	20848	609	575.97	154	slump										1												3	29
318	U1356	A	86	R	5	W	38	42	819.73	819.77	819.75	8.9484	20848	1010	129.177	56	F1																						2	11
318	U1356	A	86	R	6	W	40	44	821.04	821.08	821.06	9.2667	20848	722	320.951	103	F1																						2	26
318	U1356	A	86	R	7	W	40	44	822.18	822.22	822.2	9.0037	20848	312	920.26	124	slump																							22
318	U1356	A	87	R	1	W	40	44	824.3	824.34	824.32	9.2229	20848	308	1277.01	174	slump																						2	27
318	U1356	A	87	R	2	W	40	44	825.81	825.85	825.83	9.4023	20848	355	331.038	53	carbonate															1					2		5	8
318	U1356	A	87	R	3	W	40	44	827.32	827.36	827.34	9.014	20848	595	509.215	131	slump																				5			23							1
318	U1356	A	87	R	4	W	40	44	828.47	828.51	828.49	9.0173	20848	684	388.713	115	slump																				3			33
318	U1356	A	87	R	5	W	40	44	829.97	830.01	829.99	9.2431	20848	318	929.161	131	slump																							12
318	U1356	A	87	R	6	W	40	44	831.47	831.51	831.49	9.3622	20848	358	690.441	111	slump															1								52
318	U1356	A	87	R	7	W	40	44	832.66	832.7	832.68	9.1276	20848	711	218.448	68	slump																							37
318	U1356	A	88	R	1	W	61	65	834.11	834.15	834.13	9.0557	20848	353	1160.88	178	F1																				4			63
318	U1356	A	88	R	2	W	98	102	835.84	835.88	835.86	9.1581	20848	387	823.524	140	F1																							75
318	U1356	A	89	R	1	W	44	48	843.54	843.58	843.56	9.2782	20848	619	849.427	234	F2																							51
318	U1356	A	89	R	2	W	39	43	844.8	844.84	844.82	9.1532	20848	329	872.3	126	F1																							54
318	U1356	A	89	R	3	W	40	44	846.11	846.15	846.13	9.352	20848	504	619.238	140	F1																							79
318	U1356	A	89	R	4	W	40	44	847.4	847.44	847.42	9.4908	20848	421	840.05	161	F1											1												86
318	U1356	A	89	R	5	W	38	42	848.63	848.67	848.65	9.2311	20848	297	859.277	113	F2																							65
318	U1356	A	91	R	3	W	24	28	864.64	864.68	864.66	16.2	20848	463	619.831	223	F2																							68
318	U1356	A	91	R	4	W	104	108	866.74	866.78	866.76	16.5	20848	156	571.012	70.5	F2																							19
318	U1356	A	91	R	5	W	1	5	866.8	866.84	866.82	15.76	20848	272	761.121	156.5	F2																							48
318	U1356	A	91	R	7	W	60	63	869.71	869.74	869.725	15.5	20848	211	497.216	78	F2																							11
318	U1356	A	92	R	1	W	64	68	872.54	872.58	872.56	19.214	20848	398	696.553	255.5	F2																							94
318	U1356	A	92	R	2	W	44	48	873.5	873.54	873.52	19.45	20848	309	409.325	118	F2																							56
318	U1356	A	92	R	2	W	84	88	873.9	873.94	873.92	19.6924	20848	473	326.782	146	F2																							71
318	U1356	A	92	R	3	W	44	48	874.46	874.5	874.48	19.9214	20848	494	223.496	105.5	F2																							62
318	U1356	A	93	R	1	W	6	10	876.66	876.7	876.68	16.25	20848	526	214.639	88	F2																							45
318	U1356	A	93	R	1	W	44	48	877.04	877.08	877.06	16.91	20848	477	275.266	106.5	slump		1																					41
318	U1356	A	93	R	1	W	64	68	877.24	877.28	877.26	19.26	20848	470	118.609	51.5	slump																							20
318	U1356	A	93	R	1	W	104	108	877.64	877.68	877.66	14.929	20848	477	197.615	67.5	F2																							31
318	U1356	A	93	R	2	W	4	8	877.99	878.03	878.01	19.904	20848	286	364.402	99.5	F1															1								36
318	U1356	A	93	R	2	W	44	48	878.39	878.43	878.41	15.698	20848	227	775.193	132.5	F1																							18
318	U1356	A	93	R	3	W	44	48	879.49	879.53	879.51	18.52	20848	574	364.774	186	bioturbated siltstones																							60							2
318	U1356	A	93	R	3	W	103	107	880.08	880.12	880.1	17.2649	20848	381	751.145	237	bioturbated siltstones						2		2		1													26									2
318	U1356	A	94	R	1	W	12	16	881.52	881.56	881.54	17.5845	20848	172	3201.78	464.5	bioturbated siltstones		1									1																					6
318	U1356	A	94	R	1	W	64	68	882.04	882.08	882.06	15.4997	20848	211	1909.22	299.5	bioturbated siltstones									1	6	1												9									10
318	U1356	A	94	R	1	W	101	105	882.41	882.45	882.43	19.4004	20848	201	328.801	61.5	bioturbated siltstones																							26
318	U1356	A	94	R	1	W	144	148	882.84	882.88	882.86	17	20848	284	1329.99	308	bioturbated siltstones		1								1													28									13
318	U1356	A	94	R	2	W	6	10	882.94	882.98	882.96	15.5702	20848	550	733.998	301.5	bioturbated siltstones																							118
318	U1356	A	94	R	2	W	40	44	883.28	883.32	883.3	17.96	20848	378	750.836	244.5	bioturbated siltstones						1		1							1								14						2			1
318	U1356	A	94	R	2	W	83	87	883.71	883.75	883.73	18.43	20848	127	2623.13	294.5	bioturbated siltstones						2			1.5				1																			5
318	U1356	A	94	R	2	W	104	108	883.92	883.96	883.94	16.48	20848	405	481.031	154	bioturbated siltstones											1												1									4
318	U1356	A	94	R	3	W	24	28	884.55	884.59	884.57	19.66	20848	451	506.701	215.5	EOT slump		0.5								1													42									1
318	U1356	A	94	R	3	W	44	48	884.75	884.79	884.77	12.78	20848	216	2039.12	270	bioturbated siltstones								3						1	1								3
318	U1356	A	94	R	3	W	124	128	885.55	885.59	885.57	19.892	20848	298	1102.57	313.5	bioturbated siltstones										6													42									1
318	U1356	A	94	R	4	W	4	8	885.67	885.71	885.69	18.98	20848	410	586.717	219	bioturbated siltstones								1		1													25									3
318	U1356	A	94	R	4	W	44	48	886.07	886.11	886.09	20.1	20848	290	895.938	250.5	bioturbated siltstones						1				2													40									12
318	U1356	A	94	R	4	W	64	68	886.27	886.31	886.29	15.94	20848	339	966.461	250.5	bioturbated siltstones		1								1													15									9
318	U1356	A	94	R	4	W	84	88	886.47	886.51	886.49	18.02	20848	308	726.842	193.5	bioturbated siltstones									2	2				1									10									6
318	U1356	A	95	R	1	W	24	27	891.24	891.27	891.255	15.7411	20848	394	485.737	144.5	bioturbated siltstones						1				0.5													29									1
318	U1356	A	95	R	1	W	64	67	891.64	891.67	891.655	13.2284	20848	529	467.736	157	EOT slump															1								4									4.5
318	U1356	A	95	R	1	W	104	107	892.04	892.07	892.055	17.95	20848	518	91.9293	41	EOT slump																							16
318	U1356	A	95	R	1	W	144	147	892.44	892.47	892.455	12.886	20848	648	493.104	197.5	EOT slump																							26
318	U1356	A	95	R	2	W	24	27	892.72	892.75	892.735	12.2027	20848	775	594.108	269.5	EOT slump						1				4													27									4
318	U1356	A	95	R	2	W	60	64	893.08	893.12	893.1	12.4036	20848	238	2069.22	293	EOT slump						0.5		1		1.5					1								20									1
318	U1356	A	95	R	2	W	90	94	893.38	893.42	893.4	11.63	20848	478	676.915	180.5	EOT slump								1		1													19									2
318	U1356	A	95	R	2	W	124	127	893.72	893.75	893.735	11.3817	20848	168	2376.86	218	EOT slump						1		1		1	3
318	U1356	A	95	R	3	W	14	17	894	894.03	894.015	13.4481	20848	97	5385.94	337	EOT slump		1		1		4		2		2					1								5									1
318	U1356	A	95	R	3	W	45	48	894.31	894.34	894.325	13.903	20848	520	728.138	252.5	EOT slump										2.5													19									2
318	U1356	A	95	R	3	W	82	85	894.68	894.71	894.695	14.9022	20848	300	1410.65	302.5	EOT slump					0.5			3						1									20									2
318	U1356	A	95	R	3	W	106	109	894.92	894.95	894.935	16.14	20848	30	11603.8	269.5	Eocene						4			1	4													2
318	U1356	A	95	R	4	W	4	7	894.99	895.02	895.005	14.3683	20848	26	21541.4	386	Eocene						1				6.5													2									2
318	U1356	A	95	R	4	W	22	25	895.17	895.2	895.185	18.7	20848	49	5926.99	260.5	Eocene																							2									1
318	U1356	A	95	R	4	W	43	46	895.38	895.41	895.395	14.2265	20848	62	8426.25	356.5	Eocene	1	14			0.5			4		3		1											3
												13.97
												13.6188
												16.62
												13.1799
												3.48862
[truncated: 195 more columns]

## Sheet: Table 1 stratigraphy GTS12
	type	FO/LO	Genus, chron	age (Gradstein 2012)	top core	top interval	bottom core	bottom interval	depth average	error		Table 1	depth average	age (Gradstein 2012)
	CONOP			10.76					98.66				98.66	10.76
	CONOP			10.92					133.8				133.8	10.92
	CONOP			13.406					133.81				133.81	13.406
	PM	(o)	C5ACn	14.07	22R-2,	75	22R-2,	90	203.225	0.075			203.225	14.07
	PM	(y)	C5Bn.2n	15.032	30R-2,	50	30R-2,	75	279.625	0.125			279.625	15.032
	PM	(o)	C5Cn.1n	16.268	39R-1,	35	39R-1,	65	364.1	0.15			364.1	16.268
	PM	(o)	C5Cn.3n	16.721	42R-2,	59	43R-1,	25	398.275	3.975			398.275	16.721
				17.5	44R-CC		45R-CC		416.9				416.9	17.5
				23	44R-CC		45R-CC		416.91				416.91	23
	PM	(o)	C6Cn.2n	23.03	45R-CC	40	46R-1	65	426.78	5			426.78	23.03
	PM	(o)	C6Cn.3n	23.3	50R-1,	0			469	9			469	23.3
	PM	(y)	C7An	24.761	63R-3,	85	63R-3,	120	597.115	0.175			597.115	24.761
	PM	(o)	C7An	24.984	64R-1,	130	64R-1,	135	604.325	0.025			604.325	24.984
	PM	(o)	C8n.1n	25.264	68R-2,	20	68R-2,	75	643.375	0.275			643.375	25.264
	PM	(y)	C8n.2n	25.304	69R-2,	20	69R-2,	25	652.575	0.025			652.575	25.304
	PM	(o)	C8n.2n	25.987	71R-6,	115	72R-1,	10	678.98	0.92			678.98	25.987
	PM	(y)	C9n	26.42	73R-4,	90	75R-1,	15	701.66	7.09			701.66	26.42
	PM	(o)	C9n	27.439	76R-6,	35	76R-6,	40	725.085	0.025			725.085	27.439
	PM	(o)	C11n.2n	29.97	82R-6,	35	82R-6,	40	782.675	0.025			782.675	29.97
	PM	(y)	C13n	33.157	93R-1,117		93R-2,	28	878	0.23			878	33.157

## Sheet: Table 2 species list
In situ taxa		Reworked taxa		Table 3
Adnatosphaeridium? sp.		Achilleodinium biformoides
Ataxodinium choane		Achomosphaera alcicornu
Batiacasphaera compta		Aiora fenestrata
Batiacasphaera spp. (pars.)		Aireiana verrucosa
Batiacasphaera hirsuta		Adnatosphaeridium spp.
Batiacasphaera micropapillata		Alisocysta circumtabulata
Batiacasphaera minuta		Alterbidinium distinctum
Batiacasphaera sphaerica		Apectodinium spp.
Batiacasphaera sp. A		Arachnodinium antarcticum
Batiacasphaera sp. B		Areoligera spp. (pars)
Batiacasphaera sp. C		Areoligera semicirculata
Batiacasphaera sp. D		Cerebrocysta bartonensis
Brigantedinium simplex		Charlesdowniea clathrata
Brigantedinium pynei		Charlesdowniea edwardsii
Brigantedinium sp. A		Cooksonidinium capricornum
Brigantedinium sp. B		Cordosphaeridium fibrospinosum
Brigantedinium sp. C		Cordosphaeridium furniculatum
Brigantedinium sp. D		Corrudinium incompositum
Cerebrocysta WR small		Corrudinium regulare
Cerebrocysta delicata		Cribroperidinium spp.
Cerebrocysta sp. A		Damassadinium crassimuratum
Cleistosphaeridium sp. B		Dapsilidinium spp.
Cleistosphaeridium sp.A		Deflandrea sp. A sensu Brinkhuis et al., 2003
Cordosphaeridium minutum		Deflandrea antarctica
Corrudinium labradori		Deflandrea cygniformis
Corrudinium sp. A		Diphyes colligerum
Cryodinium? sp.		Deflandrea spp. Indet
Distatodinium spp.		Eisenackia circumtabulata
Edwardsiella sexispinosa		Enneadocysta diktyostila
Elytrocysta sp. A		Enneadocysta multicornuta
Elytrocysta brevis		Eocladopyxis tesselata
Gelatia inflata		Fibrocysta axialis
Habibacysta? spp.		Glaphyrocysta intricta
Homotryblium spp.		Glaphyrocysta pastielsii
Hystrichokolpoma bullatum		Heteraulacacysta leptalea
Huystrichosphaeropsis obscura		Histiocysta palla
Impagidinium spp. (pars)		Hystrichokolpoma pusilla
Impagidinium aculeatum		Hystrichokolpoma rigaudiae
Impagidinium cantabrigiense		Hystrichokolpoma truncatum
Impagidinium elegans		Hystrichosphaeridium truswelliae
Impagidinium elongatum		Hystrichosphaeridium tubiferum
Impagidinium pacificum		Impagidinium maculatum
Impagidinium pallidum		Impagidinium waipawense
Impagidinium paradoxum		Kenleyia spp.
Impagidinium patulum		Manumiella druggii
Impagidinium plicatum		Melitasphaeridium pseudorecurvatum
Impagidinium velorum		Membranophoridium perforatum
Impagidinium victorianum		Octodinium askiniae
Impagidinium sp. A		Odontochitina spp.
Impagidinium sphaericum		Operculodinium spp.
Invertocysta tabulata		Phthanoperidinium antarcticum
Islandinium spp.		Phthanoperidinium echinatum
Lejeunecysta attenuata		Polysphaeridium spp.
Lejeunecysta adeliense		Rhombodinium sp.
Lejeunecysta fallax		Schematophora speciosa
Lejeunecysta cowei		Schematophora obscura
Lejeunecysta acuminata		Senegalinium spp.
Lejeunecysta rotunda		Spinidinium luciae
Lejeunecysta katatonos		Spinidinium macmurdoense
Malvinia escutiana		Spinidinium schellenbergii
Nematosphaeropsis labyrinthus		Spiniferites ramosus CPX
Oligokolpoma galeotti		Thalassiphora pelagica
Operculodinium tiara		Turbiosphaera filosa
Operculodinium sp. A		Turbiosphaera sagena
Operculodinium piaseckii		Vozzhennikovia apertura/ S.schellenbergii group
Operculodinium janduchenei		Vozzhennikovia netrona
Operculodinium cf eirikianum		?Vozzhenikovia LARGE
Operculodinium eirikianum		Wetzeliella articulata
Paleocystodinium golzowense
Paucisphaeridium spp.
Phthanoperidinium amoenum
Pyxidinopsis spp. (pars)
Pyxidinopsis sp. A
Pyxidinopsis sp. B
Pyxidinopsis sp. C
Pyxidinopsis sp. D
Pyxidinopsis vesciculata
Pyxidinopsis tuberculata
Pyxidinopsis reticulata
Pyxidinopsis fairhavensis
Reticulatosphaera actinocoronata
Selenopemphix antarctica
Selenopemphix nephroides
Selenopemphix dioneacysta
Selenopemphix sp. A
Selenopemphix undulata
Selenopemphix brinkhuisi
Spiniferites sp. B
Spiniferites sp. A
Spiniferites sp. C
Stoveracysta ornata
Stoveracysta kakanuiensis
?Svalbardella spp.
Tectatodinium spp.
Unipontedinium aquaeductus
Protoperidinioid indet
Protoperidinium sp. B
Protoperidinium sp. A
Protoperidinium sp. C
Protoperidinium sp. D
