# Supplementary material for: Paleoceanography and ice sheet variability offshore Wilkes Land, Antarctica – Part 2: Insights from Oligocene–Miocene dinoflagellate cyst assemblages
Source: Copernicus journal article supplement (doi:10.5194/cp-14-1015-2018), 2018-07-11
Supplement: Supplementary file 2 [file dino ecogroups per lithology.xls]

## Sheet: F1
depth (mbsf)	Lithology	Selenopemphix antarctica	age Selenopemphix spp (pars)	Selenopemphix spp (pars)	Lejeunecysta cpx	Brigantedinium cpx	Malvinia escutiana	Protoperidinium cpx	Spiniferites	Nematosphaeropsis	Batiacasphaera	Corrudinium cpx	Operculodinium	Impagidinium	others	total p
95.61	lamin diatom ooze	39.5349	0	1	0	25.5814	0	0	0	0	4.65116	2.32558	2.32558	20.9302	4.65116	#REF!
129.81	lamin diatom ooze	1.49254	31.3433	1	1.49254	44.7761	0	5.97015	0	2.98507	4.47761	0	4.47761	2.98507	0	#REF!
156.21	lamin diatom ooze	8.69565	37.6812	1	2.89855	28.9855	0	11.5942	0	0	1.44928	1.44928	1.44928	1.44928	4.34783	#REF!
141.01	lamin diatom ooze	12	26	1	4	38	0	4	0	2	0	4	2	6	2	#REF!
153.21	lamin diatom ooze	0	20	1	24	40	0	0	0	0	4	0	4	4	4	#REF!
165.72	lamin diatom ooze	13.6364	21.2121	1	6.06061	22.7273	0	22.7273	0	0	0	0	6.06061	1.51515	6.06061	#REF!
202.61	lamin diatom ooze	14.2857	28.5714	1	7.14286	17.8571	0	17.8571	0	0	0	7.14286	7.14286	0	0	#REF!
221.52	lamin diatom ooze	35.7143	14.2857	1	0	21.4286	0	7.14286	0	0	0	21.4286	0	0	0	#REF!
316.18	lamin diatom ooze	3.00752	0	1	0	3.7594	0	0.75188	0	0	24.0602	11.2782	21.0526	1.50376	34.5865	#REF!
320.11	lamin diatom ooze	13.5802	9.87654	1	2.46914	34.5679	0	0	0	0	16.0494	12.3457	6.17284	3.7037	1.23457	#REF!
327.21	lamin diatom ooze	3.18471	4.4586	1	5.73248	36.9427	0	1.91083	0	3.18471	29.9363	8.28025	3.82166	1.91083	0.636943	#REF!
632.105	F1	0	11.1111	1	2.77778	25	0	58.3333	0	0	0	0	0	2.77778	0	#REF!
643.1	F1	0	23.0769	1	5.12821	51.2821	0	20.5128	0	0	0	0	0	0	0	#REF!
656.79	F1	0	0	1	10	0	0	50	0	0	30	0	0	10	0	#REF!
662.27	F1	0	2.77778	1	0	75	0	5.55556	0	0	2.77778	0	13.8889	0	0	#REF!
670.38	F1	0	2.85714	1	5.71429	68.5714	0	22.8571	0	0	0	0	0	0	0	#REF!
680.01	F1	0	25.5814	1	4.65116	55.814	0	4.65116	0	0	4.65116	0	2.32558	2.32558	0	#REF!
685.43	F1	0	5.06329	1	1.26582	20.2532	0	50.6329	3.79747	0	6.32911	2.53165	0	3.79747	6.32911	#REF!
689.59	F1	2.75862	16.8966	1	13.4483	32.069	0	32.7586	0	0	1.37931	0.689655	0	0	0	#REF!
776.62	F1	0	1.94175	1	10.6796	38.835	0	42.7184	0	0	2.91262	0.970874	0.970874	0	0.970874	#REF!
777.62	F1	0	3.87097	1	20	71.6129	0.645161	0.645161	0	0	0.645161	1.93548	0	0.645161	0	#REF!
778.96	F1	0.854701	2.5641	1	12.8205	75.2137	0	1.7094	0	0	1.7094	4.2735	0	0.854701	0	#REF!
780.3	F1	0	1.30719	1	10.4575	65.3595	0	15.0327	0	0	0	5.22876	1.30719	1.30719	0	#REF!
795.17	F1	0	1.76471	1	20.5882	58.8235	1.76471	0	0	0	0	7.64706	4.70588	3.52941	1.17647	#REF!
805.52	F1	0	5.40541	1	29.0541	44.5946	0	10.8108	0	2.02703	0.675676	0	4.05405	1.35135	2.02703	#REF!
806	F1	0	0	1	0	50	0	3.125	0	3.125	3.125	6.25	3.125	25	6.25	#REF!
806.2	F1	2.85714	8.09524	1	12.8571	71.4286	0	0.952381	0	0	0	2.38095	0	1.42857	0	#REF!
806.43	F1	0.456621	4.56621	1	49.7717	32.8767	1.36986	10.0457	0	0	0.456621	0	0	0.456621	0	#REF!
806.56	F1	1.28755	6.00858	1	13.3047	75.5365	0	0	0	0.429185	0	0.858369	0	2.14592	0.429185	#REF!
806.96	F1	0.440529	3.52423	1	14.5374	80.6167	0	0	0	0	0	0	0.440529	0.440529	0	#REF!
807.01	F1	0.490196	13.7255	1	15.6863	68.6275	0	0	0	0	0	0	0.490196	0	0.980392	#REF!
816.2	F1	0	0	1	56.4103	10.2564	0	7.69231	0	1.28205	3.84615	3.84615	3.84615	11.5385	1.28205	#REF!
819.75	F1	0	1.85185	1	57.4074	20.3704	0	1.85185	0	0	9.25926	0	1.85185	7.40741	0	#REF!
821.06	F1	4	2	1	45	26	0	17	0	0	2	0	2	1	1	#REF!
834.13	F1	0.588235	7.64706	1	40.5882	37.0588	2.94118	1.17647	0	2.35294	2.35294	0	2.94118	2.35294	0	#REF!
835.86	F1	1.47059	11.0294	1	23.5294	55.1471	3.67647	2.94118	0	0	0	0	0.735294	0.735294	0.735294	#REF!
844.82	F1	3.96825	11.9048	1	38.8889	42.8571	0.793651	0.793651	0	0	0	0	0	0	0.793651	#REF!
846.13	F1	0	1.55039	1	26.3566	61.2403	8.52713	0	0	0	0.775194	0	0	1.55039	0	#REF!
847.42	F1	1.89873	1.26582	1	25.3165	54.4304	8.86076	3.16456	0	0	0	0	0	3.16456	1.89873	#REF!
878.01	F1	6.09756	2.43902	1	7.31707	43.9024	24.3902	4.26829	0	0	6.09756	0	0	3.65854	1.82927	#REF!
878.41	F1	3.36134	4.20168	1	8.82353	15.1261	14.2857	10.084	0	0	25.2101	0	0	17.2269	1.68067	#REF!
	avg	4.28444	9.20627	4	15.5165	42.5007	1.64036	11.0065	0.0926212	0.424049	4.60553	2.55763	2.46794	3.62665	2.07074	#REF!
	17% percentile	0	1.50175	2	2.27382	21.2169	0	0	0	0	0	0	0	0	0	#REF!
	83% percentile	6.61718	20.2424	2	26.8961	68.5826	1.44883	20.9557	0	0.599758	6.14387	5.43301	4.13877	4.4	2.42162	#REF!

## Sheet: F2
depth (mbsf)	Lithology	Selenopemphix antarctica	age Selenopemphix spp. (pars)	Selenopemphix spp. (pars)	Lejeunecysta cpx	Brigantedinium cpx	Malvinia escutiana	Protoperidinium cpx	Spiniferites	Nematosphaeropsis	Batiacasphaera	Corrudinium cpx	Operculodinium	Impagidinium	others	total p
879.51	Lavender bioturbated siltstones	4.13793	1.37931	1	12.069	41.3793	30	1.72414	0	0.689655	0.689655	1.37931	0	3.10345	3.44828	#REF!
880.1	Lavender bioturbated siltstones	2.42424	2.42424	1	8.48485	31.5152	23.6364	0	0	0	0	1.21212	0	13.3333	16.9697	#REF!
881.54	Lavender bioturbated siltstones	0	0	1	0	0	2.66667	0	0	0	0	0	0	8	89.3333	#REF!
882.06	Lavender bioturbated siltstones	0	0	1	6.66667	30	3.33333	0	0	0	0	0	0	30	30	#REF!
882.43	Lavender bioturbated siltstones	1.90476	7.61905	1	17.1429	49.5238	17.1429	0	0	0	1.90476	0	0	4.7619	0	#REF!
882.86	Lavender bioturbated siltstones	1.17647	3.52941	1	3.52941	32.9412	15.2941	1.17647	0	0	0	1.17647	1.17647	15.2941	24.7059	#REF!
882.96	Lavender bioturbated siltstones	15.0538	1.79211	1	15.9498	42.2939	9.319	5.19713	0	0	0	0	0.358423	8.24373	1.79211	#REF!
883.3	Lavender bioturbated siltstones	1.85185	4.93827	1	11.1111	17.284	13.5802	2.46914	0	0	1.23457	2.46914	0	19.1358	25.9259	#REF!
883.73	Lavender bioturbated siltstones	0	0	1	0	0	0	0	1.96078	0	1.96078	0	0	10.7843	85.2941	#REF!
883.94	Lavender bioturbated siltstones	0	0	1	0	3.84615	0	0	0	0	0	0	0	26.9231	69.2308	#REF!
884.77	Lavender bioturbated siltstones	0	5.88235	1	5.88235	17.6471	0	0	0	0	17.6471	0	0	47.0588	5.88235	#REF!
885.57	Lavender bioturbated siltstones	8.36237	0.696864	1	9.05923	29.2683	29.2683	0	0	0	0	0	0	12.892	10.453	#REF!
885.69	Lavender bioturbated siltstones	14.9733	1.06952	1	13.369	26.738	13.9037	3.20856	0	0	3.20856	0	0	7.48663	16.0428	#REF!
886.09	Lavender bioturbated siltstones	5.76132	3.29218	1	9.87654	32.9218	24.6914	3.29218	0	0	0.823045	0	0	10.2881	9.0535	#REF!
886.29	Lavender bioturbated siltstones	3.59281	5.98802	1	9.58084	17.9641	35.9281	0	0	1.1976	9.58084	0	0	4.19162	11.976	#REF!
886.49	Lavender bioturbated siltstones	0	3.125	1	15.625	15.625	27.3438	0	0	0	4.6875	0	0	11.7188	21.875	#REF!
891.255	Lavender bioturbated siltstones	4.0404	1.0101	1	20.202	29.2929	30.8081	2.0202	0	0	1.0101	0	0	10.6061	1.0101	#REF!
444.19	carbonate	0	5.55556	1	5.55556	27.7778	0	5.55556	0	22.2222	11.1111	5.55556	5.55556	11.1111	0	#REF!
445.49	carbonate	0	0	1	0	0	0	14.5161	0	9.67742	4.83871	3.22581	8.06452	58.0645	1.6129	#REF!
802.41	carbonate	0	13.2296	1	28.7938	31.1284	3.11284	6.61479	0	0	5.05837	8.56031	0.77821	0.77821	1.94553	#REF!
802.49	carbonate	0	7.45098	1	25.8824	2.7451	7.05882	34.902	0	1.17647	0	13.7255	2.7451	2.35294	1.96078	#REF!
803.29	carbonate	0	8.33333	1	25	25	2.38095	25.7937	0	1.19048	0	9.12698	1.19048	0.396825	1.5873	#REF!
803.49	carbonate	0	7.22892	1	36.5462	18.8755	0	26.1044	0	0	0	4.81928	2.81124	1.60643	2.00803	#REF!
825.83	carbonate	0	4.87805	1	14.6341	19.5122	2.43902	12.1951	0	7.31707	21.9512	0	4.87805	7.31707	4.87805	#REF!
411.81	Grey silty clays diatom ooze	0	0	1	0	0	0	0	0	22.1053	18.9474	6.31579	14.7368	25.2632	12.6316	#REF!
421.32	Grey silty clays diatom ooze	0	3.94737	1	10.5263	53.9474	0	19.7368	0	0	2.63158	0	0	0	9.21053	#REF!
106.61	Grey silty clays diatom ooze	15.2542	0	1	0.847458	4.23729	0	2.54237	0	16.1017	20.339	12.7119	6.77966	1.69492	19.4915	#REF!
116.41	Grey silty clays diatom ooze	2.38095	0	1	0	2.38095	0	4.7619	0	50	16.6667	7.14286	0	16.6667	0	#REF!
127.31	Grey silty clays diatom ooze	15.3846	9.61538	1	5.76923	11.5385	0	3.84615	0	15.3846	17.3077	3.84615	5.76923	9.61538	1.92308	#REF!
138.51	Grey silty clays diatom ooze	14.2857	4.7619	1	4.7619	23.8095	0	0	0	0	23.8095	4.7619	9.52381	14.2857	0	#REF!
363.81	Grey silty clays diatom ooze	0	0	1	0	0	0	0	0	0	6.66667	26.6667	16.6667	43.3333	6.66667	#REF!
374.9	Grey silty clays diatom ooze	0	4.16667	1	0	0	0	8.33333	0	8.33333	8.33333	12.5	33.3333	12.5	12.5	#REF!
393.91	Grey silty clays diatom ooze	2.15054	3.22581	1	2.15054	4.30108	0	0	0	13.9785	19.3548	1.07527	27.957	25.8065	0	#REF!
403.71	Grey silty clays diatom ooze	0	1.2987	1	0	0	0	0	0	12.987	5.19481	7.79221	16.8831	54.5455	1.2987	#REF!
623.99	F2	0	6.84932	1	0.684932	27.3973	0	9.58904	0	0	3.42466	0	52.0548	0	0	#REF!
282.21	F2	0	0	1	0	1.38889	0	0	2.77778	5.55556	5.55556	12.5	43.0556	13.8889	15.2778	#REF!
284.61	F2	0	0	1	0	0	0	0	0	0	0	14.2857	85.7143	0	0	#REF!
647.92	F2	0	0	1	0	0	0	0	0	36.3636	0	0	27.2727	36.3636	0	#REF!
660.8	F2	0	0	1	0	12.5	0	25	0	0	12.5	12.5	0	37.5	0	#REF!
671.54	F2	0	0	1	0	3.0303	0	21.2121	12.1212	3.0303	9.09091	0	9.09091	42.4242	0	#REF!
674.31	F2	0	0	1	0	5	0	45	0	5	10	0	15	20	0	#REF!
682.81	F2	0	6.66667	1	0	3.33333	0	43.3333	0	3.33333	20	3.33333	6.66667	6.66667	6.66667	#REF!
693.86	F2	0	0	1	5.88235	23.5294	0	5.88235	0	41.1765	5.88235	0	5.88235	5.88235	5.88235	#REF!
723.89	F2	0	5.26316	1	17.5439	15.7895	0	40.3509	0	14.0351	3.50877	0	1.75439	1.75439	0	#REF!
739.05	F2	0	14.5161	1	4.83871	1.6129	0	62.9032	0	3.22581	0	9.67742	0	3.22581	0	#REF!
741.46	F2	0	10.9589	1	5.47945	12.3288	0	63.6986	0	0	4.10959	2.73973	0.684932	0	0	#REF!
747.19	F2	0	0	1	0	0	0	56.25	0	0	6.25	25	0	6.25	6.25	#REF!
751.55	F2	1.21951	3.65854	1	4.87805	3.65854	0	59.7561	0	1.21951	14.6341	3.65854	1.21951	1.21951	4.87805	#REF!
781.54	F2	0	3.84615	1	3.84615	23.0769	3.84615	53.8462	0	3.84615	0	3.84615	0	3.84615	0	#REF!
801.01	F2	0.947867	3.79147	1	18.4834	36.019	0.947867	21.327	0	2.36967	1.4218	2.8436	0.473934	4.73934	6.63507	#REF!
801.21	F2	0.507614	6.59898	1	46.7005	9.13706	3.04569	24.3655	0.507614	1.52284	0	1.01523	3.04569	0.507614	3.04569	#REF!
801.41	F2	0	4.04624	1	28.9017	7.51445	0.578035	49.711	0	0.578035	2.31214	1.7341	3.46821	1.15607	0	#REF!
801.6	F2	0	10.4265	1	52.1327	26.5403	0.947867	5.21327	0	0	0	0.947867	0.473934	0.947867	2.36967	#REF!
801.81	F2	0	9.6	1	45.2	25.6	2	6.4	0	0.4	1.2	3.6	2.8	1.6	1.6	#REF!
802.01	F2	0	8.92857	1	42.4107	32.1429	3.125	0.446429	0	0.446429	1.33929	4.91071	2.67857	2.67857	0.892857	#REF!
802.21	F2	0	11.25	1	47.9167	28.3333	0.833333	0.833333	0	0	1.66667	5	2.91667	0.833333	0.416667	#REF!
802.69	F2	0	13.0282	1	35.9155	17.9577	3.16901	19.0141	0.352113	0.352113	0.352113	6.69014	1.40845	0.352113	1.40845	#REF!
802.89	F2	0.947867	10.4265	1	63.0332	10.9005	0.473934	10.4265	0	0	2.36967	0.473934	0	0.947867	0	#REF!
803.08	F2	0	12.2605	1	38.3142	28.7356	2.29885	12.6437	0	1.14943	0.383142	1.53257	1.14943	0.766284	0.766284	#REF!
803.6	F2	0.395257	10.2767	1	17.3913	19.7628	1.18577	39.1304	0	1.18577	0.395257	1.58103	3.55731	1.97628	3.16206	#REF!
803.8	F2	0	11.0656	1	11.8852	14.3443	1.63934	51.6393	0	0.819672	1.22951	0.409836	3.27869	2.04918	1.63934	#REF!
804	F2	3.31492	4.41989	1	41.4365	26.5193	1.10497	9.39227	0	0.552486	3.8674	2.76243	3.31492	2.20994	1.10497	#REF!
804.92	F2	0	5.47945	1	17.8082	47.9452	0	0	0	8.21918	0	10.9589	1.36986	6.84932	1.36986	#REF!
805.72	F2	0	0	1	0	0	0	14.8148	0	48.1481	3.7037	0	3.7037	22.2222	7.40741	#REF!
807.61	F2	0	10.687	1	17.9389	68.7023	0	1.14504	0	0	0	1.14504	0	0.381679	0	#REF!
807.81	F2	0	9.50413	1	16.9421	68.1818	0.413223	2.06612	0	0	0.413223	1.65289	0	0.826446	0	#REF!
808.01	F2	0.854701	14.1026	1	22.2222	61.5385	0	0	0	0.854701	0	0.42735	0	0	0	#REF!
808.21	F2	0	10.7438	1	21.9008	64.876	0.413223	0	0	0	0	1.23967	0.413223	0.413223	0	#REF!
808.41	F2	0.617284	3.39506	1	12.037	37.3457	0	0.308642	0	0	0	44.7531	1.23457	0.308642	0	#REF!
843.56	F2	0.862069	4.31034	1	37.5	21.9828	0	30.1724	0	1.2931	0	2.15517	0.431034	0.862069	0.431034	#REF!
848.65	F2	0	1.96078	1	15.6863	63.7255	2.94118	11.7647	0	0.980392	0.980392	0	0	0.980392	0.980392	#REF!
864.66	F2	11.3208	3.30189	1	33.4906	32.0755	11.7925	2.83019	0	0	0	0	0	5.18868	0	#REF!
866.76	F2	10.219	0	1	36.4964	27.7372	12.4088	11.6788	0	0	0	0	0	1.45985	0	#REF!
866.82	F2	8.58209	1.49254	1	25.3731	35.8209	10.4478	16.791	0	0	0	0	0	0.746269	0.746269	#REF!
869.73	F2	18.3099	0	1	31.6901	15.493	31.6901	0	0	0	0	0	0	2.8169	0	#REF!
872.56	F2	3.84615	1.28205	1	29.7009	40.1709	21.1538	0.641026	0	1.28205	0	0	0	0.42735	1.49573	#REF!
873.52	F2	4.46429	0	1	32.1429	50	6.25	2.67857	0	0.892857	0.892857	0	0	2.67857	0	#REF!
873.92	F2	2.20588	2.94118	1	25.7353	52.2059	7.35294	0.735294	0	0	0	0	0	8.08824	0.735294	#REF!
874.48	F2	1.94175	0	1	8.25243	60.1942	15.534	4.36893	0	0	0	0	0	9.70874	0	#REF!
876.68	F2	4.62428	0	1	5.20231	52.0231	15.0289	21.3873	0	0	0	0	0	1.7341	0	#REF!
877.66	F2	7.08661	6.29921	1	11.0236	48.8189	18.8976	0	0	0	6.29921	0	0	1.5748	0	#REF!
	avg	2.40744	4.44218	4	15.4696	23.5615	5.82009	12.8733	0.218759	4.5703	4.30543	3.91898	5.47311	9.8298	7.1095	#REF!
	17% percentile	0	0	2	0	2.59944	0	0	0	0	0	0	0	0.773439	0	#REF!
	83% percentile	4.26847	9.60615	2	31.8712	41.7451	14.3538	25.918	0	7.67792	9.28688	7.4026	6.71186	17.6543	11.0622	#REF!

## Sheet: slumps
depth (mbsf)	Lithology	Selenopemphix antarctica	age Selenopemphix spp. (pars)	Selenopemphix spp. (pars)	Lejeunecysta cpx	Brigantedinium cpx	Malvinia escutiana	Protoperidinium cpx	Spiniferites	Nematosphaeropsis	Batiacasphaera	Corrudinium cpx	Operculodinium	Impagidinium	others	total p
884.57	EOT slumps	7.2	1.6	1	18	33.6	27.2	0	0	0.8	1.6	0	0	3.2	6.8	#REF!
891.655	EOT slumps	13.3333	4.44444	1	31.1111	8.88889	12.2222	2.22222	0	0	4.44444	2.22222	0	16.6667	4.44444	#REF!
892.055	EOT slumps	0	2.63158	1	25	42.1053	10.5263	2.63158	0	0	0	0	0	17.1053	0	#REF!
892.455	EOT slumps	9.15033	1.30719	1	22.8758	33.9869	5.22876	2.61438	0	1.30719	5.22876	0	0	14.3791	3.92157	#REF!
892.735	EOT slumps	8	1.33333	1	12.6667	36	10.6667	0	0	0	1.33333	0	0	20.6667	9.33333	#REF!
893.1	EOT slumps	3.10078	0	1	15.5039	31.0078	10.0775	0	0	1.55039	1.55039	0	0	10.8527	26.3566	#REF!
893.4	EOT slumps	8.33333	0	1	17.2619	22.619	18.4524	1.78571	0	0	4.7619	0	0	22.619	4.16667	#REF!
893.735	EOT slumps	28.5714	17.1429	1	17.1429	0	0	0	0	0	5.71429	0	0	5.71429	25.7143	#REF!
894.015	EOT slumps	0	0	1	8.69565	21.7391	0	0	0	0	4.34783	4.34783	0	8.69565	52.1739	#REF!
894.325	EOT slumps	6.31579	0	1	0	40	6.31579	0	0	4.21053	2.10526	0	0	14.7368	26.3158	#REF!
894.695	EOT slumps	3.22581	0	1	12.9032	25.8065	16.7742	0	0	0	1.29032	0	0	10.3226	29.6774	#REF!
173.81	red slump	0	0	1	0	0	0	0	0	32	0	20	20	12	16	#REF!
178.32	red slump	0	0	1	0	0	0	1.47059	0	26.4706	5.88235	14.7059	29.4118	10.2941	11.7647	#REF!
183.41	red slump	15.5556	8.88889	1	6.66667	31.1111	0	6.66667	0	0	0	4.44444	6.66667	0	20	#REF!
193.01	red slump	4.87805	29.2683	1	0	28.0488	0	0	0	0	14.6341	1.21951	8.53659	1.21951	12.1951	#REF!
711.56	Orange Slump	0	4.58716	1	2.75229	22.9358	0	67.8899	0	0	0	0.917431	0	0	0.917431	#REF!
719.65	Orange Slump	0	2.5	1	1.66667	21.6667	0	74.1667	0	0	0	0	0	0	0	#REF!
722.38	Orange Slump	0	12.5	1	0	25	0	37.5	0	0	0	0	0	0	25	#REF!
728.28	Orange Slump	0	3.57143	1	3.57143	29.7619	0	57.1429	0	0	0	0	1.19048	3.57143	1.19048	#REF!
795.32	Orange Slump	0	0	1	0	62.5	0	0	0	12.5	0	12.5	0	12.5	0	#REF!
795.56	Orange Slump	0	6.35838	1	17.341	18.4971	0	29.4798	0	0.578035	15.6069	2.31214	4.04624	4.62428	1.15607	#REF!
795.73	Orange Slump	0	2.77778	1	34.2593	56.0185	0.462963	0.462963	0	1.85185	0	1.38889	1.38889	0.925926	0.462963	#REF!
795.91	Orange Slump	0	1.79372	1	27.3543	62.3318	0.896861	0	0	0.44843	0	2.24215	0	3.13901	1.79372	#REF!
796.12	Orange Slump	0	1.75439	1	19.2982	28.9474	0	0	0	11.4035	5.26316	4.38596	23.6842	4.38596	0.877193	#REF!
796.32	Orange Slump	0	2.43902	1	10.9756	75.6098	0	0	0	1.21951	1.21951	3.65854	2.43902	2.43902	0	#REF!
796.53	Orange Slump	0	2.71739	1	34.7826	53.2609	0.543478	0	0	0	2.71739	4.34783	0	1.08696	0.543478	#REF!
796.69	Orange Slump	0	2.91262	1	25.2427	64.0777	1.45631	0	0	0	1.45631	2.42718	0.970874	0.485437	0.970874	#REF!
796.9	Orange Slump	0.518135	16.0622	1	46.114	11.399	0	17.0984	0	0	1.03627	1.03627	0	5.69948	1.03627	#REF!
797.12	Orange Slump	0	6.25	1	16.25	40	2.5	0	0	0	2.5	7.5	13.75	10	1.25	#REF!
797.31	Orange Slump	0.666667	1.33333	1	20	69.3333	0.666667	0	0	0.666667	2	0	2	3.33333	0	#REF!
797.51	Orange Slump	0	2.06897	1	27.2414	57.931	0	6.55172	0	0.344828	0	1.72414	1.72414	1.37931	1.03448	#REF!
797.71	Orange Slump	0	4.36508	1	26.5873	46.4286	0	7.53968	0	0.396825	2.77778	9.12698	0.396825	0.793651	1.5873	#REF!
797.91	Orange Slump	0	3.43511	1	25.9542	46.5649	0.381679	5.72519	0	0	2.29008	14.5038	0.763359	0	0.381679	#REF!
798.02	Orange Slump	0	5.40541	1	19.8198	58.5586	2.7027	0	0	0	0	4.5045	5.40541	3.6036	0	#REF!
798.21	Orange Slump	0	3.4188	1	36.7521	50.4274	0	4.2735	0	0	0	3.4188	0	0.854701	0.854701	#REF!
798.4	Orange Slump	0	17.9487	1	35.8974	28.2051	0	12.8205	0	0	2.5641	0	0	2.5641	0	#REF!
798.62	Orange Slump	0	3.52941	1	40	46.2745	0.392157	2.35294	0	0	0	6.27451	0	0.392157	0.784314	#REF!
799.02	Orange Slump	0	3.77358	1	23.7736	65.283	0.377358	4.5283	0	0	0	0.377358	0.377358	1.13208	0.377358	#REF!
799.22	Orange Slump	0	9.01288	1	37.3391	46.3519	0.429185	1.28755	0	1.28755	0.429185	0.429185	0.858369	0.858369	1.71674	#REF!
799.42	Orange Slump	0	9.92366	1	37.7863	32.4427	10.3053	6.10687	0	0	0	0.763359	0	1.52672	1.14504	#REF!
799.51	Orange Slump	0	7.22892	1	21.6867	59.4378	0	6.82731	0	0	0.401606	2.00803	0.803213	0.803213	0.803213	#REF!
799.71	Orange Slump	0	9.43396	1	23.8994	55.3459	0.628931	5.03145	0	0	0	1.88679	1.88679	1.25786	0.628931	#REF!
799.91	Orange Slump	0	6.73077	1	30.7692	26.9231	0	27.8846	0	0	5.76923	0	0	1.92308	0	#REF!
800.1	Orange Slump	0	0	1	34.0741	50.3704	2.22222	2.96296	0	0	0	5.18519	1.48148	2.96296	0.740741	#REF!
800.31	Orange Slump	0	7.26257	1	31.8436	8.93855	1.67598	37.9888	0	0.558659	1.11732	5.02793	1.67598	2.23464	1.67598	#REF!
800.51	Orange Slump	0	9.63303	1	32.1101	16.055	5.04587	24.3119	0	0.917431	0	5.9633	0.917431	2.75229	2.29358	#REF!
800.71	Orange Slump	0.462963	6.94444	1	30.0926	18.0556	0.462963	30.0926	0.462963	3.24074	0	3.7037	0.462963	3.24074	2.77778	#REF!
800.91	Orange Slump	1.37615	4.58716	1	18.3486	37.6147	0	23.8532	0	1.83486	0	5.04587	0.917431	3.66972	2.75229	#REF!
804.2	Orange Slump	0	9.54545	1	19.5455	21.8182	0	29.0909	0	2.27273	0.909091	5.90909	4.54545	3.18182	3.18182	#REF!
807.21	Orange Slump	0	8.66426	1	19.1336	68.5921	0	0	0	1.08303	1.08303	0.361011	1.08303	0	0	#REF!
807.41	Orange Slump	0.632911	6.96203	1	40.5063	48.7342	0.632911	1.26582	0	0	0	0.632911	0.632911	0	0	#REF!
808.51	Orange Slump	0	4.19847	1	22.5191	45.8015	1.9084	0.763359	0	1.52672	0	20.229	1.14504	0.763359	1.14504	#REF!
808.71	Orange Slump	0.787402	7.87402	1	16.9291	44.0945	0.393701	0.393701	0	0	1.9685	24.8031	1.1811	1.1811	0.393701	#REF!
808.91	Orange Slump	0	3.53982	1	21.6814	28.3186	0	2.21239	0	0	1.32743	38.0531	1.76991	2.65487	0.442478	#REF!
809.11	Orange Slump	1.07143	2.85714	1	30	44.6429	0.357143	0	0	0.357143	0.357143	18.2143	0	1.42857	0.714286	#REF!
809.31	Orange Slump	0.826446	5.78512	1	24.7934	49.5868	0	0	0	0	0	17.7686	0	0.826446	0.413223	#REF!
809.51	Orange Slump	0	2.07469	1	19.917	59.751	0	0	0	1.24481	0	14.5228	0.829876	0.829876	0.829876	#REF!
809.72	Orange Slump	0	5.3719	1	39.6694	50	0	0	0	0.413223	0	0	0.413223	3.71901	0.413223	#REF!
809.91	Orange Slump	0.44843	8.52018	1	43.0493	39.9103	0.44843	0	0	1.34529	0	2.24215	0.896861	2.69058	0.44843	#REF!
810.01	Orange Slump	0.772201	3.4749	1	20.4633	72.2008	0.3861	0	0	0	0	1.1583	0	0.772201	0.772201	#REF!
810.21	Orange Slump	2.05761	7.81893	1	34.1564	50.6173	0	0	0	0.411523	0	0.411523	0.411523	2.46914	1.64609	#REF!
810.415	Orange Slump	0	1.31004	1	33.1878	20.9607	0	2.62009	0	1.31004	1.31004	11.3537	25.3275	2.18341	0.436681	#REF!
810.58	Orange Slump	0.766284	3.06513	1	25.6705	64.751	0.383142	0	0	1.14943	0	0	0.383142	1.53257	2.29885	#REF!
810.81	Orange Slump	0.829876	8.29876	1	34.0249	50.2075	0.829876	0.829876	0	0.414938	0.829876	0.414938	0	2.90456	0.414938	#REF!
811.01	Orange Slump	0.458716	5.04587	1	36.6972	37.6147	2.29358	0.917431	0	0.917431	4.12844	4.12844	0	6.42202	1.37615	#REF!
814.72	Orange Slump	0.952381	1.90476	1	49.5238	28.5714	1.90476	5.71429	0	1.90476	0.952381	0	2.85714	4.7619	0.952381	#REF!
818.4	Orange Slump	1.5748	3.93701	1	48.8189	22.8346	0.787402	12.5984	0	0.787402	3.14961	1.5748	0.787402	1.5748	1.5748	#REF!
822.2	Orange Slump	0.826446	1.65289	1	67.7686	18.1818	0.826446	6.61157	0	0	0	0	0	4.13223	0	#REF!
824.32	Orange Slump	11.1111	1.48148	1	58.5185	20	1.48148	5.18519	0	0	1.48148	0	0	0.740741	0	#REF!
827.34	Orange Slump	1.75439	7.89474	1	50	20.1754	1.75439	4.38596	0	2.63158	5.26316	1.75439	0	2.63158	1.75439	#REF!
828.49	Orange Slump	4.9505	2.9703	1	38.6139	32.6733	0	7.92079	0	0	2.9703	0.990099	1.9802	1.9802	4.9505	#REF!
829.99	Orange Slump	0	3.125	1	79.6875	9.375	1.5625	3.90625	0	0	0	0	0.78125	0.78125	0.78125	#REF!
831.49	Orange Slump	1.92308	4.80769	1	33.6538	50	4.80769	0	0	0	1.92308	0	0	0.961538	1.92308	#REF!
832.68	Orange Slump	4.41176	2.94118	1	32.3529	54.4118	4.41176	1.47059	0	0	0	0	0	0	0	#REF!
877.06	Orange Slump	3.31492	2.20994	1	9.94475	45.3039	23.2044	7.73481	0	0	0	0	0	3.8674	4.41989	#REF!
877.26	Orange Slump	10.101	8.08081	1	2.0202	40.404	28.2828	4.0404	0	0	4.0404	0	0	3.0303	0	#REF!
	avg	2.10868	5.05643	4	25.4508	37.9868	2.9641	8.01227	0.00609162	1.59681	1.73337	4.26476	2.32607	4.08729	4.40658	#REF!
	17% percentile	0	1.44444	2	10.7179	20.7644	0	0	0	0	0	0	0	0.778988	0	#REF!
	83% percentile	3.58913	8.35411	2	37.4509	56.4966	4.86724	12.6539	0	1.39065	3.37231	6.58088	1.98515	6.99043	4.57096	#REF!

## Sheet: debris flows
depth (mbsf)	Lithology	Selenopemphix antarctica	age Selenopemphix spp. (pars)	Selenopemphix spp. (pars)	Lejeunecysta cpx	Brigantedinium cpx	Malvinia escutiana	Protoperidinium cpx	Spiniferites	Nematosphaeropsis	Batiacasphaera	Corrudinium cpx	Operculodinium	Impagidinium	others	total p
459.515	Debris flows	0	0	1	2.17391	43.4783	0	36.9565	0	0	4.34783	0	10.8696	2.17391	0	#REF!
469.27	Debris flows	0	3.22581	1	2.15054	25.8065	0	58.0645	0	1.07527	5.37634	1.07527	2.15054	1.07527	0	#REF!
488.31	Debris flows	0	1.64835	1	1.0989	42.3077	0	46.7033	0	0.549451	0	0.549451	2.74725	3.2967	1.0989	#REF!
499.46	Debris flows	0	1.6129	1	10.4839	62.9032	0	23.3871	0	0	0.806452	0.806452	0	0	0	#REF!
500.11	Debris flows	0	0	1	1.78571	41.0714	0	50	0	0	3.57143	0	0	3.57143	0	#REF!
507.61	Debris flows	0	0	1	8.16327	48.9796	0	32.6531	0	0	0	2.04082	2.04082	6.12245	0	#REF!
508.99	Debris flows	0	2.29885	1	4.5977	35.6322	0	37.931	0	0	0	8.04598	5.74713	3.44828	2.29885	#REF!
510.3	Debris flows	0	7.69231	1	0	53.8462	0	11.5385	0	0	0	15.3846	11.5385	0	0	#REF!
517.19	Debris flows	0	0	1	11.1111	0	0	26.6667	0	2.22222	0	8.88889	22.2222	6.66667	22.2222	#REF!
518.19	Debris flows	0	1.2987	1	12.987	20.7792	0	15.5844	0	1.2987	11.6883	3.8961	18.1818	11.6883	2.5974	#REF!
536.02	Debris flows	0	2.77778	1	0	17.5926	0	13.8889	0	9.25926	0.925926	2.77778	20.3704	31.4815	0.925926	#REF!
555.18	Debris flows	1.08696	0	1	7.6087	58.6957	0	32.6087	0	0	0	0	0	0	0	#REF!
421.52	Brown Debris flows	0	2.63158	1	0	76.3158	0	18.4211	0	0	0	0	0	2.63158	0	#REF!
421.62	Brown Debris flows	1.81818	0	1	5.45455	54.5455	0	14.5455	0	0	0	1.81818	1.81818	0	20	#REF!
421.77	Brown Debris flows	0	0	1	3.75	87.5	0	2.5	0	0	2.5	0	1.25	2.5	0	#REF!
421.92	Brown Debris flows	0.806452	4.03226	1	12.9032	60.4839	0	11.2903	0	0	1.6129	4.03226	0.806452	1.6129	2.41935	#REF!
422.04	Brown Debris flows	0	3.63636	1	12.7273	74.5455	0	0	0	0	1.81818	5.45455	1.81818	0	0	#REF!
431.27	Brown Debris flows	0	0	1	0	2.72727	0	0	0	42.7273	0	3.63636	7.27273	38.1818	5.45455	#REF!
431.5	Brown Debris flows	0	0	1	0	4.88722	0	0	0	21.0526	0.37594	34.2105	14.2857	22.1805	3.00752	#REF!
431.71	Brown Debris flows	0	0	1	0	24.2857	2.85714	0	0	21.4286	1.42857	27.1429	2.85714	17.1429	2.85714	#REF!
432.02	Brown Debris flows	0	0	1	0	0	0	0	0	45.5357	0	19.6429	3.57143	28.5714	2.67857	#REF!
432.42	Brown Debris flows	0	0	1	0	0	0	0	0	8.57143	0	8.57143	22.8571	57.1429	2.85714	#REF!
432.76	Brown Debris flows	0	0	1	0	0	0	0	0	36.1702	0	10.6383	14.8936	36.1702	2.12766	#REF!
432.96	Brown Debris flows	1.92308	1.92308	1	0	0.961538	0	0	0	18.2692	3.84615	22.1154	10.5769	34.6154	5.76923	#REF!
433.16	Brown Debris flows	1	14	1	7	39	0	0	0	11	0	9	8	10	1	#REF!
433.7	Brown Debris flows	0	0	1	2.12766	0	0	0	0	17.0213	2.12766	51.0638	8.51064	17.0213	2.12766	#REF!
433.84	Brown Debris flows	0	0.456621	1	0.913242	3.19635	0	0	0	50.2283	0	11.4155	8.6758	22.3744	2.73973	#REF!
433.92	Brown Debris flows	0	0.403226	1	0.403226	0	0	0	0	52.8226	0	11.2903	10.0806	22.1774	2.82258	#REF!
433.94	Brown Debris flows	0.813008	0	1	0	0	0	0	0	52.0325	1.62602	14.6341	5.69106	22.7642	2.43902	#REF!
434.11	Brown Debris flows	6.45161	22.5806	1	9.67742	45.1613	0	0	0	3.22581	0	6.45161	0	6.45161	0	#REF!
434.19	Brown Debris flows	0	0	1	2.35294	11.7647	0	0	0	29.4118	0	35.2941	4.70588	16.4706	0	#REF!
440.53	Brown Debris flows	0	1.72414	1	0	3.44828	0	22.4138	0	27.5862	1.72414	5.17241	17.2414	17.2414	3.44828	#REF!
440.63	Brown Debris flows	0	0.813008	1	0.406504	1.21951	0	0	0	40.6504	1.62602	25.2033	5.69106	21.5447	2.84553	#REF!
440.87	Brown Debris flows	0	0	1	1.4218	19.4313	0	0	0	14.6919	0.947867	25.1185	9.95261	26.0664	2.36967	#REF!
441.06	Brown Debris flows	0	0	1	0	0	0	0	0	45.7364	0	22.4806	3.10078	27.907	0.775194	#REF!
441.1	Brown Debris flows	0	0	1	0	0	0	0	0	22.7723	0	21.7822	4.9505	49.505	0.990099	#REF!
441.12	Brown Debris flows	0	0	1	0	0	0	0	0	30.9524	0	26.7857	4.16667	37.5	0.595238	#REF!
441.77	Brown Debris flows	0	0	1	0	0	0	0	0	17.2662	0.719424	49.6403	10.7914	21.5827	0	#REF!
441.93	Brown Debris flows	0	0	1	2.5641	69.2308	0	0	0	0	10.2564	10.2564	2.5641	5.12821	0	#REF!
442.28	Brown Debris flows	1.40845	4.22535	1	2.11268	69.0141	0	0	0	1.40845	0	11.9718	4.92958	4.22535	0.704225	#REF!
442.88	Brown Debris flows	0	5.37634	1	3.22581	82.7957	0	3.22581	0	1.07527	0	2.15054	2.15054	0	0	#REF!
443.08	Brown Debris flows	0	5	1	0	90	0	0	0	0	0	2.5	2.5	0	0	#REF!
449.97	Brown Debris flows	0	21.4612	1	10.0457	34.7032	0	26.9406	0	0	0	0.913242	1.36986	4.56621	0	#REF!
452.7	Brown Debris flows	0	3.21101	1	5.50459	31.1927	0	52.2936	0	1.37615	1.83486	3.66972	0.458716	0.458716	0	#REF!
452.93	Brown Debris flows	0.537634	2.68817	1	13.9785	52.6882	0	25.2688	0	0.537634	2.15054	0	0	2.15054	0	#REF!
480.29	Brown Debris flows	0	3.57143	1	1.78571	25	0	35.7143	0	0	12.5	5.35714	7.14286	7.14286	1.78571	#REF!
537.3	Brown Debris flows	0	0	1	0	17.7083	0	13.5417	0	6.25	6.25	29.1667	7.29167	19.7917	0	#REF!
545.6	Brown Debris flows	0	2.38095	1	0	5.95238	0.595238	1.78571	0	10.119	25.5952	8.92857	33.3333	11.3095	0	#REF!
	avg	0.330112	2.51396	4	3.34408	29.9761	0.0719246	12.7901	0	15.6246	2.20117	11.8953	7.10781	14.2428	2.10328	#REF!
	17% percentile	0	0	2	0	0	0	0	0	0	0	0.912174	1.24556	1.0691	0	#REF!
	83% percentile	0.540323	3.64032	2	8.17841	60.5081	0	32.6091	0	31.0046	3.57418	25.1193	11.5659	27.9136	2.84564	#REF!

## Sheet: Sheet1
depth (mbsf)	age (Gradstein 2012) (ref)	Lithology	Selenopemphix antarctica	age Selenopemphix spp (pars)	Lejeunecysta cpx	Brigantedinium cpx	Malvinia escutiana	Protoperidinium cpx	Spiniferites	Nematosphaeropsis	Batiacasphaera	Corrudinium cpx	Operculodinium	Impagidinium	others
95.61	10.7461	lamin diatom ooze	39.5349	0	0	25.5814	0	0	0	0	4.65116	2.32558	2.32558	20.9302	4.65116
106.61	10.7962	Grey silty clays diatom ooze	15.2542	0	0.847458	4.23729	0	2.54237	0	16.1017	20.339	12.7119	6.77966	1.69492	19.4915
116.41	10.8408	Grey silty clays diatom ooze	2.38095	0	0	2.38095	0	4.7619	0	50	16.6667	7.14286	0	16.6667	0
127.31	10.8904	Grey silty clays diatom ooze	15.3846	9.61538	5.76923	11.5385	0	3.84615	0	15.3846	17.3077	3.84615	5.76923	9.61538	1.92308
129.81	10.9018	lamin diatom ooze	1.49254	31.3433	1.49254	44.7761	0	5.97015	0	2.98507	4.47761	0	4.47761	2.98507	0
138.51	13.4547	Grey silty clays diatom ooze	14.2857	4.7619	4.7619	23.8095	0	0	0	0	23.8095	4.7619	9.52381	14.2857	0
141.01	13.4785	lamin diatom ooze	12	26	4	38	0	4	0	2	0	4	2	6	2
153.21	13.5944	lamin diatom ooze	0	20	24	40	0	0	0	0	4	0	4	4	4
156.21	13.623	lamin diatom ooze	8.69565	37.6812	2.89855	28.9855	0	11.5942	0	0	1.44928	1.44928	1.44928	1.44928	4.34783
165.72	13.7134	lamin diatom ooze	13.6364	21.2121	6.06061	22.7273	0	22.7273	0	0	0	0	6.06061	1.51515	6.06061
173.81	13.7903	red slump	0	0	0	0	0	0	0	32	0	20	20	12	16
178.32	13.8332	red slump	0	0	0	0	0	1.47059	0	26.4706	5.88235	14.7059	29.4118	10.2941	11.7647
183.41	13.8816	red slump	15.5556	8.88889	6.66667	31.1111	0	6.66667	0	0	0	4.44444	6.66667	0	20
193.01	13.9728	red slump	4.87805	29.2683	0	28.0488	0	0	0	0	14.6341	1.21951	8.53659	1.21951	12.1951
202.61	14.0641	lamin diatom ooze	14.2857	28.5714	7.14286	17.8571	0	17.8571	0	0	0	7.14286	7.14286	0	0
221.52	14.2998	lamin diatom ooze	35.7143	14.2857	0	21.4286	0	7.14286	0	0	0	21.4286	0	0	0
282.21	15.0679	F2	0	0	0	1.38889	0	0	2.77778	5.55556	5.55556	12.5	43.0556	13.8889	15.2778
284.61	15.1031	F2	0	0	0	0	0	0	0	0	0	14.2857	85.7143	0	0
316.18	15.5665	lamin diatom ooze	3.00752	0	0	3.7594	0	0.75188	0	0	24.0602	11.2782	21.0526	1.50376	34.5865
320.11	15.6242	lamin diatom ooze	13.5802	9.87654	2.46914	34.5679	0	0	0	0	16.0494	12.3457	6.17284	3.7037	1.23457
327.21	15.7285	lamin diatom ooze	3.18471	4.4586	5.73248	36.9427	0	1.91083	0	3.18471	29.9363	8.28025	3.82166	1.91083	0.636943
363.81	16.2657	Grey silty clays diatom ooze	0	0	0	0	0	0	0	0	6.66667	26.6667	16.6667	43.3333	6.66667
374.9	16.4122	Grey silty clays diatom ooze	0	4.16667	0	0	0	8.33333	0	8.33333	8.33333	12.5	33.3333	12.5	12.5
393.91	16.6625	Grey silty clays diatom ooze	2.15054	3.22581	2.15054	4.30108	0	0	0	13.9785	19.3548	1.07527	27.957	25.8065	0
403.71	16.9475	Grey silty clays diatom ooze	0	1.2987	0	0	0	0	0	12.987	5.19481	7.79221	16.8831	54.5455	1.2987
411.81	17.2868	Grey silty clays diatom ooze	0	0	0	0	0	0	0	22.1053	18.9474	6.31579	14.7368	25.2632	12.6316
421.32	23.0134	Grey silty clays diatom ooze	0	3.94737	10.5263	53.9474	0	19.7368	0	0	2.63158	0	0	0	9.21053
421.52	23.014	Brown Debris flows	0	2.63158	0	76.3158	0	18.4211	0	0	0	0	0	2.63158	0
421.62	23.0143	Brown Debris flows	1.81818	0	5.45455	54.5455	0	14.5455	0	0	0	1.81818	1.81818	0	20
421.77	23.0148	Brown Debris flows	0	0	3.75	87.5	0	2.5	0	0	2.5	0	1.25	2.5	0
421.92	23.0152	Brown Debris flows	0.806452	4.03226	12.9032	60.4839	0	11.2903	0	0	1.6129	4.03226	0.806452	1.6129	2.41935
422.04	23.0156	Brown Debris flows	0	3.63636	12.7273	74.5455	0	0	0	0	1.81818	5.45455	1.81818	0	0
431.27	23.0587	Brown Debris flows	0	0	0	2.72727	0	0	0	42.7273	0	3.63636	7.27273	38.1818	5.45455
431.5	23.0602	Brown Debris flows	0	0	0	4.88722	0	0	0	21.0526	0.37594	34.2105	14.2857	22.1805	3.00752
431.71	23.0615	Brown Debris flows	0	0	0	24.2857	2.85714	0	0	21.4286	1.42857	27.1429	2.85714	17.1429	2.85714
432.02	23.0635	Brown Debris flows	0	0	0	0	0	0	0	45.5357	0	19.6429	3.57143	28.5714	2.67857
432.42	23.0661	Brown Debris flows	0	0	0	0	0	0	0	8.57143	0	8.57143	22.8571	57.1429	2.85714
432.76	23.0682	Brown Debris flows	0	0	0	0	0	0	0	36.1702	0	10.6383	14.8936	36.1702	2.12766
432.96	23.0695	Brown Debris flows	1.92308	1.92308	0	0.961538	0	0	0	18.2692	3.84615	22.1154	10.5769	34.6154	5.76923
433.16	23.0708	Brown Debris flows	1	14	7	39	0	0	0	11	0	9	8	10	1
433.7	23.0743	Brown Debris flows	0	0	2.12766	0	0	0	0	17.0213	2.12766	51.0638	8.51064	17.0213	2.12766
433.84	23.0751	Brown Debris flows	0	0.456621	0.913242	3.19635	0	0	0	50.2283	0	11.4155	8.6758	22.3744	2.73973
433.92	23.0757	Brown Debris flows	0	0.403226	0.403226	0	0	0	0	52.8226	0	11.2903	10.0806	22.1774	2.82258
433.94	23.0758	Brown Debris flows	0.813008	0	0	0	0	0	0	52.0325	1.62602	14.6341	5.69106	22.7642	2.43902
434.11	23.0769	Brown Debris flows	6.45161	22.5806	9.67742	45.1613	0	0	0	3.22581	0	6.45161	0	6.45161	0
434.19	23.0774	Brown Debris flows	0	0	2.35294	11.7647	0	0	0	29.4118	0	35.2941	4.70588	16.4706	0
440.53	23.1179	Brown Debris flows	0	1.72414	0	3.44828	0	22.4138	0	27.5862	1.72414	5.17241	17.2414	17.2414	3.44828
440.63	23.1186	Brown Debris flows	0	0.813008	0.406504	1.21951	0	0	0	40.6504	1.62602	25.2033	5.69106	21.5447	2.84553
440.87	23.1201	Brown Debris flows	0	0	1.4218	19.4313	0	0	0	14.6919	0.947867	25.1185	9.95261	26.0664	2.36967
441.06	23.1213	Brown Debris flows	0	0	0	0	0	0	0	45.7364	0	22.4806	3.10078	27.907	0.775194
441.1	23.1216	Brown Debris flows	0	0	0	0	0	0	0	22.7723	0	21.7822	4.9505	49.505	0.990099
441.12	23.1217	Brown Debris flows	0	0	0	0	0	0	0	30.9524	0	26.7857	4.16667	37.5	0.595238
441.77	23.1259	Brown Debris flows	0	0	0	0	0	0	0	17.2662	0.719424	49.6403	10.7914	21.5827	0
441.93	23.1269	Brown Debris flows	0	0	2.5641	69.2308	0	0	0	0	10.2564	10.2564	2.5641	5.12821	0
442.28	23.1291	Brown Debris flows	1.40845	4.22535	2.11268	69.0141	0	0	0	1.40845	0	11.9718	4.92958	4.22535	0.704225
442.88	23.133	Brown Debris flows	0	5.37634	3.22581	82.7957	0	3.22581	0	1.07527	0	2.15054	2.15054	0	0
443.08	23.1342	Brown Debris flows	0	5	0	90	0	0	0	0	0	2.5	2.5	0	0
444.19	23.1413	carbonate	0	5.55556	5.55556	27.7778	0	5.55556	0	22.2222	11.1111	5.55556	5.55556	11.1111	0
445.49	23.1497	carbonate	0	0	0	0	0	14.5161	0	9.67742	4.83871	3.22581	8.06452	58.0645	1.6129
449.97	23.1783	Brown Debris flows	0	21.4612	10.0457	34.7032	0	26.9406	0	0	0	0.913242	1.36986	4.56621	0
452.7	23.1958	Brown Debris flows	0	3.21101	5.50459	31.1927	0	52.2936	0	1.37615	1.83486	3.66972	0.458716	0.458716	0
452.93	23.1972	Brown Debris flows	0.537634	2.68817	13.9785	52.6882	0	25.2688	0	0.537634	2.15054	0	0	2.15054	0
459.515	23.2394	Debris flows	0	0	2.17391	43.4783	0	36.9565	0	0	4.34783	0	10.8696	2.17391	0
469.27	23.3031	Debris flows	0	3.22581	2.15054	25.8065	0	58.0645	0	1.07527	5.37634	1.07527	2.15054	1.07527	0
480.29	23.4287	Brown Debris flows	0	3.57143	1.78571	25	0	35.7143	0	0	12.5	5.35714	7.14286	7.14286	1.78571
488.31	23.52	Debris flows	0	1.64835	1.0989	42.3077	0	46.7033	0	0.549451	0	0.549451	2.74725	3.2967	1.0989
499.46	23.6471	Debris flows	0	1.6129	10.4839	62.9032	0	23.3871	0	0	0.806452	0.806452	0	0	0
500.11	23.6545	Debris flows	0	0	1.78571	41.0714	0	50	0	0	3.57143	0	0	3.57143	0
507.61	23.74	Debris flows	0	0	8.16327	48.9796	0	32.6531	0	0	0	2.04082	2.04082	6.12245	0
508.99	23.7557	Debris flows	0	2.29885	4.5977	35.6322	0	37.931	0	0	0	8.04598	5.74713	3.44828	2.29885
510.3	23.7706	Debris flows	0	7.69231	0	53.8462	0	11.5385	0	0	0	15.3846	11.5385	0	0
517.19	23.8492	Debris flows	0	0	11.1111	0	0	26.6667	0	2.22222	0	8.88889	22.2222	6.66667	22.2222
518.19	23.8605	Debris flows	0	1.2987	12.987	20.7792	0	15.5844	0	1.2987	11.6883	3.8961	18.1818	11.6883	2.5974
536.02	24.0637	Debris flows	0	2.77778	0	17.5926	0	13.8889	0	9.25926	0.925926	2.77778	20.3704	31.4815	0.925926
537.3	24.0783	Brown Debris flows	0	0	0	17.7083	0	13.5417	0	6.25	6.25	29.1667	7.29167	19.7917	0
545.6	24.1729	Brown Debris flows	0	2.38095	0	5.95238	0.595238	1.78571	0	10.119	25.5952	8.92857	33.3333	11.3095	0
555.18	24.2821	Debris flows	1.08696	0	7.6087	58.6957	0	32.6087	0	0	0	0	0	0	0
623.99	25.121	F2	0	6.84932	0.684932	27.3973	0	9.58904	0	0	3.42466	0	52.0548	0	0
632.105	25.1792	F1	0	11.1111	2.77778	25	0	58.3333	0	0	0	0	0	2.77778	0
643.1	25.258	F1	0	23.0769	5.12821	51.2821	0	20.5128	0	0	0	0	0	0	0
647.92	25.2797	F2	0	0	0	0	0	0	0	36.3636	0	0	27.2727	36.3636	0
656.79	25.41	F1	0	0	10	0	0	50	0	0	30	0	0	10	0
660.8	25.5148	F2	0	0	0	12.5	0	25	0	0	12.5	12.5	0	37.5	0
662.27	25.5533	F1	0	2.77778	0	75	0	5.55556	0	0	2.77778	0	13.8889	0	0
670.38	25.7652	F1	0	2.85714	5.71429	68.5714	0	22.8571	0	0	0	0	0	0	0
671.54	25.7955	F2	0	0	0	3.0303	0	21.2121	12.1212	3.0303	9.09091	0	9.09091	42.4242	0
674.31	25.8679	F2	0	0	0	5	0	45	0	5	10	0	15	20	0
680.01	26.0095	F1	0	25.5814	4.65116	55.814	0	4.65116	0	0	4.65116	0	2.32558	2.32558	0
682.81	26.0626	F2	0	6.66667	0	3.33333	0	43.3333	0	3.33333	20	3.33333	6.66667	6.66667	6.66667
685.43	26.1123	F1	0	5.06329	1.26582	20.2532	0	50.6329	3.79747	0	6.32911	2.53165	0	3.79747	6.32911
689.59	26.1912	F1	2.75862	16.8966	13.4483	32.069	0	32.7586	0	0	1.37931	0.689655	0	0	0
693.86	26.2721	F2	0	0	5.88235	23.5294	0	5.88235	0	41.1765	5.88235	0	5.88235	5.88235	5.88235
711.56	26.851	Orange Slump	0	4.58716	2.75229	22.9358	0	67.8899	0	0	0	0.917431	0	0	0.917431
719.65	27.2032	Orange Slump	0	2.5	1.66667	21.6667	0	74.1667	0	0	0	0	0	0	0
722.38	27.322	Orange Slump	0	12.5	0	25	0	37.5	0	0	0	0	0	0	25
723.89	27.3878	F2	0	5.26316	17.5439	15.7895	0	40.3509	0	14.0351	3.50877	0	1.75439	1.75439	0
728.28	27.5801	Orange Slump	0	3.57143	3.57143	29.7619	0	57.1429	0	0	0	0	1.19048	3.57143	1.19048
739.05	28.0533	F2	0	14.5161	4.83871	1.6129	0	62.9032	0	3.22581	0	9.67742	0	3.22581	0
741.46	28.1592	F2	0	10.9589	5.47945	12.3288	0	63.6986	0	0	4.10959	2.73973	0.684932	0	0
747.19	28.4109	F2	0	0	0	0	0	56.25	0	0	6.25	25	0	6.25	6.25
751.55	28.6024	F2	1.21951	3.65854	4.87805	3.65854	0	59.7561	0	1.21951	14.6341	3.65854	1.21951	1.21951	4.87805
776.62	29.7038	F1	0	1.94175	10.6796	38.835	0	42.7184	0	0	2.91262	0.970874	0.970874	0	0.970874
777.62	29.7477	F1	0	3.87097	20	71.6129	0.645161	0.645161	0	0	0.645161	1.93548	0	0.645161	0
778.96	29.8066	F1	0.854701	2.5641	12.8205	75.2137	0	1.7094	0	0	1.7094	4.2735	0	0.854701	0
780.3	29.8654	F1	0	1.30719	10.4575	65.3595	0	15.0327	0	0	0	5.22876	1.30719	1.30719	0
781.54	29.9199	F2	0	3.84615	3.84615	23.0769	3.84615	53.8462	0	3.84615	0	3.84615	0	3.84615	0
795.17	30.388	F1	0	1.76471	20.5882	58.8235	1.76471	0	0	0	0	7.64706	4.70588	3.52941	1.17647
795.32	30.393	Orange Slump	0	0	0	62.5	0	0	0	12.5	0	12.5	0	12.5	0
795.56	30.401	Orange Slump	0	6.35838	17.341	18.4971	0	29.4798	0	0.578035	15.6069	2.31214	4.04624	4.62428	1.15607
795.73	30.4067	Orange Slump	0	2.77778	34.2593	56.0185	0.462963	0.462963	0	1.85185	0	1.38889	1.38889	0.925926	0.462963
795.91	30.4128	Orange Slump	0	1.79372	27.3543	62.3318	0.896861	0	0	0.44843	0	2.24215	0	3.13901	1.79372
796.12	30.4198	Orange Slump	0	1.75439	19.2982	28.9474	0	0	0	11.4035	5.26316	4.38596	23.6842	4.38596	0.877193
796.32	30.4265	Orange Slump	0	2.43902	10.9756	75.6098	0	0	0	1.21951	1.21951	3.65854	2.43902	2.43902	0
796.53	30.4335	Orange Slump	0	2.71739	34.7826	53.2609	0.543478	0	0	0	2.71739	4.34783	0	1.08696	0.543478
796.69	30.4389	Orange Slump	0	2.91262	25.2427	64.0777	1.45631	0	0	0	1.45631	2.42718	0.970874	0.485437	0.970874
796.9	30.4459	Orange Slump	0.518135	16.0622	46.114	11.399	0	17.0984	0	0	1.03627	1.03627	0	5.69948	1.03627
797.12	30.4533	Orange Slump	0	6.25	16.25	40	2.5	0	0	0	2.5	7.5	13.75	10	1.25
797.31	30.4596	Orange Slump	0.666667	1.33333	20	69.3333	0.666667	0	0	0.666667	2	0	2	3.33333	0
797.51	30.4663	Orange Slump	0	2.06897	27.2414	57.931	0	6.55172	0	0.344828	0	1.72414	1.72414	1.37931	1.03448
797.71	30.473	Orange Slump	0	4.36508	26.5873	46.4286	0	7.53968	0	0.396825	2.77778	9.12698	0.396825	0.793651	1.5873
797.91	30.4797	Orange Slump	0	3.43511	25.9542	46.5649	0.381679	5.72519	0	0	2.29008	14.5038	0.763359	0	0.381679
798.02	30.4834	Orange Slump	0	5.40541	19.8198	58.5586	2.7027	0	0	0	0	4.5045	5.40541	3.6036	0
798.21	30.4897	Orange Slump	0	3.4188	36.7521	50.4274	0	4.2735	0	0	0	3.4188	0	0.854701	0.854701
798.4	30.4961	Orange Slump	0	17.9487	35.8974	28.2051	0	12.8205	0	0	2.5641	0	0	2.5641	0
798.62	30.5035	Orange Slump	0	3.52941	40	46.2745	0.392157	2.35294	0	0	0	6.27451	0	0.392157	0.784314
799.02	30.5168	Orange Slump	0	3.77358	23.7736	65.283	0.377358	4.5283	0	0	0	0.377358	0.377358	1.13208	0.377358
799.22	30.5235	Orange Slump	0	9.01288	37.3391	46.3519	0.429185	1.28755	0	1.28755	0.429185	0.429185	0.858369	0.858369	1.71674
799.42	30.5302	Orange Slump	0	9.92366	37.7863	32.4427	10.3053	6.10687	0	0	0	0.763359	0	1.52672	1.14504
799.51	30.5332	Orange Slump	0	7.22892	21.6867	59.4378	0	6.82731	0	0	0.401606	2.00803	0.803213	0.803213	0.803213
799.71	30.5399	Orange Slump	0	9.43396	23.8994	55.3459	0.628931	5.03145	0	0	0	1.88679	1.88679	1.25786	0.628931
799.91	30.5466	Orange Slump	0	6.73077	30.7692	26.9231	0	27.8846	0	0	5.76923	0	0	1.92308	0
800.1	30.553	Orange Slump	0	0	34.0741	50.3704	2.22222	2.96296	0	0	0	5.18519	1.48148	2.96296	0.740741
800.31	30.56	Orange Slump	0	7.26257	31.8436	8.93855	1.67598	37.9888	0	0.558659	1.11732	5.02793	1.67598	2.23464	1.67598
800.51	30.5667	Orange Slump	0	9.63303	32.1101	16.055	5.04587	24.3119	0	0.917431	0	5.9633	0.917431	2.75229	2.29358
800.71	30.5734	Orange Slump	0.462963	6.94444	30.0926	18.0556	0.462963	30.0926	0.462963	3.24074	0	3.7037	0.462963	3.24074	2.77778
800.91	30.5801	Orange Slump	1.37615	4.58716	18.3486	37.6147	0	23.8532	0	1.83486	0	5.04587	0.917431	3.66972	2.75229
801.01	30.5834	F2	0.947867	3.79147	18.4834	36.019	0.947867	21.327	0	2.36967	1.4218	2.8436	0.473934	4.73934	6.63507
801.21	30.5901	F2	0.507614	6.59898	46.7005	9.13706	3.04569	24.3655	0.507614	1.52284	0	1.01523	3.04569	0.507614	3.04569
801.41	30.5968	F2	0	4.04624	28.9017	7.51445	0.578035	49.711	0	0.578035	2.31214	1.7341	3.46821	1.15607	0
801.6	30.6032	F2	0	10.4265	52.1327	26.5403	0.947867	5.21327	0	0	0	0.947867	0.473934	0.947867	2.36967
801.81	30.6102	F2	0	9.6	45.2	25.6	2	6.4	0	0.4	1.2	3.6	2.8	1.6	1.6
802.01	30.6169	F2	0	8.92857	42.4107	32.1429	3.125	0.446429	0	0.446429	1.33929	4.91071	2.67857	2.67857	0.892857
802.21	30.6236	F2	0	11.25	47.9167	28.3333	0.833333	0.833333	0	0	1.66667	5	2.91667	0.833333	0.416667
802.41	30.6303	carbonate	0	13.2296	28.7938	31.1284	3.11284	6.61479	0	0	5.05837	8.56031	0.77821	0.77821	1.94553
802.49	30.633	carbonate	0	7.45098	25.8824	2.7451	7.05882	34.902	0	1.17647	0	13.7255	2.7451	2.35294	1.96078
802.69	30.6397	F2	0	13.0282	35.9155	17.9577	3.16901	19.0141	0.352113	0.352113	0.352113	6.69014	1.40845	0.352113	1.40845
802.89	30.6464	F2	0.947867	10.4265	63.0332	10.9005	0.473934	10.4265	0	0	2.36967	0.473934	0	0.947867	0
803.08	30.6527	F2	0	12.2605	38.3142	28.7356	2.29885	12.6437	0	1.14943	0.383142	1.53257	1.14943	0.766284	0.766284
803.29	30.6597	carbonate	0	8.33333	25	25	2.38095	25.7937	0	1.19048	0	9.12698	1.19048	0.396825	1.5873
803.49	30.6664	carbonate	0	7.22892	36.5462	18.8755	0	26.1044	0	0	0	4.81928	2.81124	1.60643	2.00803
803.6	30.6701	F2	0.395257	10.2767	17.3913	19.7628	1.18577	39.1304	0	1.18577	0.395257	1.58103	3.55731	1.97628	3.16206
803.8	30.6768	F2	0	11.0656	11.8852	14.3443	1.63934	51.6393	0	0.819672	1.22951	0.409836	3.27869	2.04918	1.63934
804	30.6835	F2	3.31492	4.41989	41.4365	26.5193	1.10497	9.39227	0	0.552486	3.8674	2.76243	3.31492	2.20994	1.10497
804.2	30.6902	Orange Slump	0	9.54545	19.5455	21.8182	0	29.0909	0	2.27273	0.909091	5.90909	4.54545	3.18182	3.18182
804.92	30.7143	F2	0	5.47945	17.8082	47.9452	0	0	0	8.21918	0	10.9589	1.36986	6.84932	1.36986
805.52	30.7344	F1	0	5.40541	29.0541	44.5946	0	10.8108	0	2.02703	0.675676	0	4.05405	1.35135	2.02703
805.72	30.7411	F2	0	0	0	0	0	14.8148	0	48.1481	3.7037	0	3.7037	22.2222	7.40741
806	30.7504	F1	0	0	0	50	0	3.125	0	3.125	3.125	6.25	3.125	25	6.25
806.2	30.7571	F1	2.85714	8.09524	12.8571	71.4286	0	0.952381	0	0	0	2.38095	0	1.42857	0
806.43	30.7648	F1	0.456621	4.56621	49.7717	32.8767	1.36986	10.0457	0	0	0.456621	0	0	0.456621	0
806.56	30.7692	F1	1.28755	6.00858	13.3047	75.5365	0	0	0	0.429185	0	0.858369	0	2.14592	0.429185
806.96	30.7826	F1	0.440529	3.52423	14.5374	80.6167	0	0	0	0	0	0	0.440529	0.440529	0
807.01	30.7842	F1	0.490196	13.7255	15.6863	68.6275	0	0	0	0	0	0	0.490196	0	0.980392
807.21	30.7909	Orange Slump	0	8.66426	19.1336	68.5921	0	0	0	1.08303	1.08303	0.361011	1.08303	0	0
807.41	30.7976	Orange Slump	0.632911	6.96203	40.5063	48.7342	0.632911	1.26582	0	0	0	0.632911	0.632911	0	0
807.61	30.8043	F2	0	10.687	17.9389	68.7023	0	1.14504	0	0	0	1.14504	0	0.381679	0
807.81	30.811	F2	0	9.50413	16.9421	68.1818	0.413223	2.06612	0	0	0.413223	1.65289	0	0.826446	0
808.01	30.8177	F2	0.854701	14.1026	22.2222	61.5385	0	0	0	0.854701	0	0.42735	0	0	0
808.21	30.8244	F2	0	10.7438	21.9008	64.876	0.413223	0	0	0	0	1.23967	0.413223	0.413223	0
808.41	30.8311	F2	0.617284	3.39506	12.037	37.3457	0	0.308642	0	0	0	44.7531	1.23457	0.308642	0
808.51	30.8344	Orange Slump	0	4.19847	22.5191	45.8015	1.9084	0.763359	0	1.52672	0	20.229	1.14504	0.763359	1.14504
808.71	30.8411	Orange Slump	0.787402	7.87402	16.9291	44.0945	0.393701	0.393701	0	0	1.9685	24.8031	1.1811	1.1811	0.393701
808.91	30.8478	Orange Slump	0	3.53982	21.6814	28.3186	0	2.21239	0	0	1.32743	38.0531	1.76991	2.65487	0.442478
809.11	30.8545	Orange Slump	1.07143	2.85714	30	44.6429	0.357143	0	0	0.357143	0.357143	18.2143	0	1.42857	0.714286
809.31	30.8612	Orange Slump	0.826446	5.78512	24.7934	49.5868	0	0	0	0	0	17.7686	0	0.826446	0.413223
809.51	30.8679	Orange Slump	0	2.07469	19.917	59.751	0	0	0	1.24481	0	14.5228	0.829876	0.829876	0.829876
809.72	30.8749	Orange Slump	0	5.3719	39.6694	50	0	0	0	0.413223	0	0	0.413223	3.71901	0.413223
809.91	30.8813	Orange Slump	0.44843	8.52018	43.0493	39.9103	0.44843	0	0	1.34529	0	2.24215	0.896861	2.69058	0.44843
810.01	30.8846	Orange Slump	0.772201	3.4749	20.4633	72.2008	0.3861	0	0	0	0	1.1583	0	0.772201	0.772201
810.21	30.8913	Orange Slump	2.05761	7.81893	34.1564	50.6173	0	0	0	0.411523	0	0.411523	0.411523	2.46914	1.64609
810.415	30.8984	Orange Slump	0	1.31004	33.1878	20.9607	0	2.62009	0	1.31004	1.31004	11.3537	25.3275	2.18341	0.436681
810.58	30.9037	Orange Slump	0.766284	3.06513	25.6705	64.751	0.383142	0	0	1.14943	0	0	0.383142	1.53257	2.29885
810.81	30.9114	Orange Slump	0.829876	8.29876	34.0249	50.2075	0.829876	0.829876	0	0.414938	0.829876	0.414938	0	2.90456	0.414938
811.01	30.9181	Orange Slump	0.458716	5.04587	36.6972	37.6147	2.29358	0.917431	0	0.917431	4.12844	4.12844	0	6.42202	1.37615
814.72	31.0423	Orange Slump	0.952381	1.90476	49.5238	28.5714	1.90476	5.71429	0	1.90476	0.952381	0	2.85714	4.7619	0.952381
816.2	31.0918	F1	0	0	56.4103	10.2564	0	7.69231	0	1.28205	3.84615	3.84615	3.84615	11.5385	1.28205
818.4	31.1654	Orange Slump	1.5748	3.93701	48.8189	22.8346	0.787402	12.5984	0	0.787402	3.14961	1.5748	0.787402	1.5748	1.5748
819.75	31.2106	F1	0	1.85185	57.4074	20.3704	0	1.85185	0	0	9.25926	0	1.85185	7.40741	0
821.06	31.2544	F1	4	2	45	26	0	17	0	0	2	0	2	1	1
822.2	31.2926	Orange Slump	0.826446	1.65289	67.7686	18.1818	0.826446	6.61157	0	0	0	0	0	4.13223	0
824.32	31.3635	Orange Slump	11.1111	1.48148	58.5185	20	1.48148	5.18519	0	0	1.48148	0	0	0.740741	0
825.83	31.4141	carbonate	0	4.87805	14.6341	19.5122	2.43902	12.1951	0	7.31707	21.9512	0	4.87805	7.31707	4.87805
827.34	31.4646	Orange Slump	1.75439	7.89474	50	20.1754	1.75439	4.38596	0	2.63158	5.26316	1.75439	0	2.63158	1.75439
828.49	31.5031	Orange Slump	4.9505	2.9703	38.6139	32.6733	0	7.92079	0	0	2.9703	0.990099	1.9802	1.9802	4.9505
829.99	31.5533	Orange Slump	0	3.125	79.6875	9.375	1.5625	3.90625	0	0	0	0	0.78125	0.78125	0.78125
831.49	31.6035	Orange Slump	1.92308	4.80769	33.6538	50	4.80769	0	0	0	1.92308	0	0	0.961538	1.92308
832.68	31.6433	Orange Slump	4.41176	2.94118	32.3529	54.4118	4.41176	1.47059	0	0	0	0	0	0	0
834.13	31.6918	F1	0.588235	7.64706	40.5882	37.0588	2.94118	1.17647	0	2.35294	2.35294	0	2.94118	2.35294	0
835.86	31.7497	F1	1.47059	11.0294	23.5294	55.1471	3.67647	2.94118	0	0	0	0	0.735294	0.735294	0.735294
843.56	32.0074	F2	0.862069	4.31034	37.5	21.9828	0	30.1724	0	1.2931	0	2.15517	0.431034	0.862069	0.431034
844.82	32.0496	F1	3.96825	11.9048	38.8889	42.8571	0.793651	0.793651	0	0	0	0	0	0	0.793651
846.13	32.0934	F1	0	1.55039	26.3566	61.2403	8.52713	0	0	0	0.775194	0	0	1.55039	0
847.42	32.1366	F1	1.89873	1.26582	25.3165	54.4304	8.86076	3.16456	0	0	0	0	0	3.16456	1.89873
848.65	32.1778	F2	0	1.96078	15.6863	63.7255	2.94118	11.7647	0	0.980392	0.980392	0	0	0.980392	0.980392
864.66	32.7136	F2	11.3208	3.30189	33.4906	32.0755	11.7925	2.83019	0	0	0	0	0	5.18868	0
866.76	32.7838	F2	10.219	0	36.4964	27.7372	12.4088	11.6788	0	0	0	0	0	1.45985	0
866.82	32.7858	F2	8.58209	1.49254	25.3731	35.8209	10.4478	16.791	0	0	0	0	0	0.746269	0.746269
869.73	32.8832	F2	18.3099	0	31.6901	15.493	31.6901	0	0	0	0	0	0	2.8169	0
872.56	32.9779	F2	3.84615	1.28205	29.7009	40.1709	21.1538	0.641026	0	1.28205	0	0	0	0.42735	1.49573
873.52	33.0101	F2	4.46429	0	32.1429	50	6.25	2.67857	0	0.892857	0.892857	0	0	2.67857	0
873.92	33.0235	F2	2.20588	2.94118	25.7353	52.2059	7.35294	0.735294	0	0	0	0	0	8.08824	0.735294
874.48	33.0422	F2	1.94175	0	8.25243	60.1942	15.534	4.36893	0	0	0	0	0	9.70874	0
876.68	33.1158	F2	4.62428	0	5.20231	52.0231	15.0289	21.3873	0	0	0	0	0	1.7341	0
877.06	33.1285	Orange Slump	3.31492	2.20994	9.94475	45.3039	23.2044	7.73481	0	0	0	0	0	3.8674	4.41989
877.26	33.1352	Orange Slump	10.101	8.08081	2.0202	40.404	28.2828	4.0404	0	0	4.0404	0	0	3.0303	0
877.66	33.1486	F2	7.08661	6.29921	11.0236	48.8189	18.8976	0	0	0	6.29921	0	0	1.5748	0
878.01	33.1603	F1	6.09756	2.43902	7.31707	43.9024	24.3902	4.26829	0	0	6.09756	0	0	3.65854	1.82927
878.41	33.1737	F1	3.36134	4.20168	8.82353	15.1261	14.2857	10.084	0	0	25.2101	0	0	17.2269	1.68067
879.51	33.2105	Lavender bioturbated siltstones	4.13793	1.37931	12.069	41.3793	30	1.72414	0	0.689655	0.689655	1.37931	0	3.10345	3.44828
880.1	33.2303	Lavender bioturbated siltstones	2.42424	2.42424	8.48485	31.5152	23.6364	0	0	0	0	1.21212	0	13.3333	16.9697
881.54	33.2785	Lavender bioturbated siltstones	0	0	0	0	2.66667	0	0	0	0	0	0	8	89.3333
882.06	33.2959	Lavender bioturbated siltstones	0	0	6.66667	30	3.33333	0	0	0	0	0	0	30	30
882.43	33.3083	Lavender bioturbated siltstones	1.90476	7.61905	17.1429	49.5238	17.1429	0	0	0	1.90476	0	0	4.7619	0
882.86	33.3226	Lavender bioturbated siltstones	1.17647	3.52941	3.52941	32.9412	15.2941	1.17647	0	0	0	1.17647	1.17647	15.2941	24.7059
882.96	33.326	Lavender bioturbated siltstones	15.0538	1.79211	15.9498	42.2939	9.319	5.19713	0	0	0	0	0.358423	8.24373	1.79211
883.3	33.3374	Lavender bioturbated siltstones	1.85185	4.93827	11.1111	17.284	13.5802	2.46914	0	0	1.23457	2.46914	0	19.1358	25.9259
883.73	33.3518	Lavender bioturbated siltstones	0	0	0	0	0	0	1.96078	0	1.96078	0	0	10.7843	85.2941
883.94	33.3588	Lavender bioturbated siltstones	0	0	0	3.84615	0	0	0	0	0	0	0	26.9231	69.2308
884.57	33.3799	EOT slumps	7.2	1.6	18	33.6	27.2	0	0	0.8	1.6	0	0	3.2	6.8
884.77	33.3866	Lavender bioturbated siltstones	0	5.88235	5.88235	17.6471	0	0	0	0	17.6471	0	0	47.0588	5.88235
885.57	33.4133	Lavender bioturbated siltstones	8.36237	0.696864	9.05923	29.2683	29.2683	0	0	0	0	0	0	12.892	10.453
885.69	33.4174	Lavender bioturbated siltstones	14.9733	1.06952	13.369	26.738	13.9037	3.20856	0	0	3.20856	0	0	7.48663	16.0428
886.09	33.4307	Lavender bioturbated siltstones	5.76132	3.29218	9.87654	32.9218	24.6914	3.29218	0	0	0.823045	0	0	10.2881	9.0535
886.29	33.4374	Lavender bioturbated siltstones	3.59281	5.98802	9.58084	17.9641	35.9281	0	0	1.1976	9.58084	0	0	4.19162	11.976
886.49	33.4441	Lavender bioturbated siltstones	0	3.125	15.625	15.625	27.3438	0	0	0	4.6875	0	0	11.7188	21.875
891.255	33.6038	Lavender bioturbated siltstones	4.0404	1.0101	20.202	29.2929	30.8081	2.0202	0	0	1.0101	0	0	10.6061	1.0101
891.655	33.6171	EOT slumps	13.3333	4.44444	31.1111	8.88889	12.2222	2.22222	0	0	4.44444	2.22222	0	16.6667	4.44444
892.055	33.6305	EOT slumps	0	2.63158	25	42.1053	10.5263	2.63158	0	0	0	0	0	17.1053	0
892.455	33.6439	EOT slumps	9.15033	1.30719	22.8758	33.9869	5.22876	2.61438	0	1.30719	5.22876	0	0	14.3791	3.92157
892.735	33.6533	EOT slumps	8	1.33333	12.6667	36	10.6667	0	0	0	1.33333	0	0	20.6667	9.33333
893.1	33.6653	EOT slumps	3.10078	0	15.5039	31.0078	10.0775	0	0	1.55039	1.55039	0	0	10.8527	26.3566
893.4	33.6754	EOT slumps	8.33333	0	17.2619	22.619	18.4524	1.78571	0	0	4.7619	0	0	22.619	4.16667
893.735	33.6868	EOT slumps	28.5714	17.1429	17.1429	0	0	0	0	0	5.71429	0	0	5.71429	25.7143
894.015	33.6961	EOT slumps	0	0	8.69565	21.7391	0	0	0	0	4.34783	4.34783	0	8.69565	52.1739
894.325	33.7065	EOT slumps	6.31579	0	0	40	6.31579	0	0	4.21053	2.10526	0	0	14.7368	26.3158
894.695	33.7189	EOT slumps	3.22581	0	12.9032	25.8065	16.7742	0	0	0	1.29032	0	0	10.3226	29.6774
