# Supplementary material for: Paleoceanography and ice sheet variability offshore Wilkes Land, Antarctica – Part 2: Insights from Oligocene–Miocene dinoflagellate cyst assemblages
Source: Copernicus journal article supplement (doi:10.5194/cp-14-1015-2018), 2018-07-11
Supplement: Supplementary file 3 [file palynological groups per lithology.xls]

## Sheet: F1
Lithology	rel reworked dinos	rel in situ dinos	rel Acritarchs	rel pollen	abs reworked dinos	abs in situ dinos	abs Acritarchs	abs pollen	abs total
lamin diatom ooze	10.2273	48.8636	30.6818	10.2273	61.1681	292.248	183.504	61.1681	598.088
lamin diatom ooze	1.25786	84.2767	7.54717	6.91824	2.18747	146.561	13.1248	12.0311	173.904
lamin diatom ooze	3.57143	61.6071	34.8214	0	16.335	281.779	159.267	0	457.381
lamin diatom ooze	25.8824	58.8235	15.2941	0	71.7974	163.176	42.4257	0	277.399
lamin diatom ooze	13.6364	56.8182	22.7273	6.81818	22.9456	95.6067	38.2427	11.4728	168.268
lamin diatom ooze	7.84314	64.7059	18.6275	8.82353	28.4505	234.716	67.5699	32.0068	362.744
lamin diatom ooze	0	75.6757	16.2162	8.10811	0	95.6687	20.5004	10.2502	126.419
lamin diatom ooze	10.5263	49.1228	28.0702	12.2807	13.2279	61.7301	35.2744	15.4325	125.665
lamin diatom ooze	1.43369	95.3405	1.43369	1.79211	7.24966	482.102	7.24966	9.06207	505.663
lamin diatom ooze	4.25532	57.4468	16.3121	21.9858	38.9024	525.182	149.126	200.996	914.206
lamin diatom ooze	0.968523	76.0291	15.4964	7.50605	6.32831	496.773	101.253	49.0444	653.398
lamin diatom ooze	0	0	0	0	0	0	0	0	0
F1	0	92.3077	3.84615	3.84615	0	161.284	6.72019	6.72019	174.725
F1	0	33.913	60.8696	5.21739	0	86.4493	155.165	13.2999	254.915
F1	0.689655	8.96552	86.8966	3.44828	4.34388	56.4704	547.328	21.7194	629.862
F1	6.25	62.5	31.25	0	3.3393	33.393	16.6965	0	53.4288
F1	0	87.8049	0	12.1951	0	98.0532	0	13.6185	111.672
F1	0	85.3659	4.87805	9.7561	0	93.3082	5.3319	10.6638	109.304
F1	5.6338	60.5634	19.7183	14.0845	8.9401	96.106	31.2903	22.3502	158.687
F1	0	65.2893	21.4876	13.2231	0	215.521	70.9309	43.6498	330.102
F1	4.30769	89.2308	1.53846	4.92308	63.4186	1313.67	22.6495	72.4784	1472.22
F1	2.98507	76.8657	5.22388	14.9254	17.0032	437.832	29.7555	85.0158	569.606
F1	6.03015	77.8894	5.52764	10.5528	36.113	466.46	33.1036	63.1978	598.874
F1	0.653595	76.4706	3.92157	18.9542	2.87278	336.115	17.2367	83.3106	439.535
F1	0.518135	79.2746	7.77202	12.4352	2.55421	390.795	38.3132	61.3012	492.963
F1	66.6667	33.3333	0	0	18.1817	9.09083	0	0	27.2725
F1	4.7619	57.8231	36.3946	1.02041	19.9037	241.688	152.121	4.26509	417.978
F1	5.85366	72.1951	19.0244	2.92683	13.0006	160.341	42.252	6.5003	222.094
F1	20	60	20	0	3.29085	9.87254	3.29085	0	16.4542
F1	7.69231	49.2308	30.7692	12.3077	5.50974	35.2623	22.039	8.81559	71.6266
F1	3.34572	78.0669	10.0372	8.55019	17.6074	410.84	52.8223	44.9968	526.266
F1	14.0741	81.1111	1.11111	3.7037	531.456	3062.86	41.957	139.857	3776.13
F1	1.59744	74.4409	16.6134	7.34824	11.6864	544.585	121.538	53.7573	731.567
F1	0.392157	89.0196	3.92157	6.66667	6.53344	1483.09	65.3344	111.068	1666.03
F1	0	84.2975	15.7025	0	0	1274.91	237.484	0	1512.4
F1	3.1746	61.9048	28.5714	6.34921	15.7947	307.997	142.152	31.5894	497.533
F1	2.46914	66.6667	4.93827	25.9259	4.61347	124.564	9.22694	48.4414	186.846
F1	2.18978	72.9927	0.729927	24.0876	9.3481	311.603	3.11603	102.829	426.897
F1	4.32432	91.8919	2.16216	1.62162	52.1744	1108.71	26.0872	19.5654	1206.53
F1	2.38095	80.9524	14.2857	2.38095	23.5292	799.994	141.175	23.5292	988.228
F1	0	81.2903	3.22581	15.4839	0	872.3	34.6151	166.152	1073.07
F1	6.39535	75	12.2093	6.39535	48.6544	570.583	92.8857	48.6544	760.778
F1	1.47059	77.451	17.1569	3.92157	15.6531	824.397	182.62	41.7416	1064.41
F1	14.1791	61.194	10.4478	14.1791	69.5844	300.311	51.2727	69.5844	490.753
F1	7.39726	65.2055	10.411	16.9863	78.982	696.211	111.16	181.366	1067.72
average	6.1119	67.5382	15.9527	8.17504	30.0596	440.227	73.8935	44.4778	588.658
17% percentile	0	57.1199	2.67271	1.30899	0	89.7416	8.19875	5.33799	126.027
83% percentile	9.08289	84.2875	28.3308	14.1337	43.9734	750.179	145.778	78.1112	1027.84

## Sheet: F2
Lithology	rel reworked dinos	rel in situ dinos	rel Acritarchs	rel pollen	abs reworked dinos	abs in situ dinos	abs Acritarchs	abs pollen	abs total
carbonate	0	24.3243	71.6216	4.05405	0	58.1459	171.207	9.69099	239.044
carbonate	0.398406	8.23373	90.9695	0.398406	3.88354	80.2599	886.742	3.88354	974.769
carbonate	5.27638	64.5729	28.6432	1.50754	41.9212	513.035	227.572	11.9775	794.506
carbonate	8.52535	58.7558	31.3364	1.38249	75.9753	523.613	279.26	12.3203	891.169
carbonate	1.67866	60.4317	34.2926	3.59712	13.236	476.495	270.392	28.3628	788.486
carbonate	4.26829	75.9146	15.8537	3.96341	55.0197	978.565	204.359	51.0897	1289.03
carbonate	9.6	32.8	54.4	3.2	74.952	256.086	424.728	24.984	780.75
Bioturbated early Oligocene siltstones	16.6341	56.7515	13.3072	13.3072	83.349	284.367	66.6792	66.6792	501.075
Bioturbated early Oligocene siltstones	56.8015	30.3309	2.57353	10.2941	489.67	261.474	22.1857	88.7429	862.073
Bioturbated early Oligocene siltstones	91.9268	8.0732	0	0	2943.3	258.486	0	0	3201.78
Bioturbated early Oligocene siltstones	77.1102	8.58369	4.86409	9.44206	1717.98	191.241	108.37	210.365	2227.95
Bioturbated early Oligocene siltstones	10.6509	62.1302	21.3018	5.91716	48.1172	280.684	96.2344	26.7318	451.767
Bioturbated early Oligocene siltstones	61.9444	23.6111	4.16667	10.2778	962.946	367.042	64.7722	159.771	1554.53
Bioturbated early Oligocene siltstones	7.16113	71.3555	13.8107	7.67263	68.1656	679.222	131.462	73.0346	951.885
Bioturbated early Oligocene siltstones	53.5188	26.5139	5.89198	14.0753	502.093	248.743	55.2763	132.049	938.161
Bioturbated early Oligocene siltstones	77.92	16.32	2.56	3.2	2168.87	454.261	71.2566	89.0708	2783.46
Bioturbated early Oligocene siltstones	79.0123	16.0494	1.85185	3.08642	399.818	81.213	9.37073	15.6179	506.019
Bioturbated early Oligocene siltstones	74.1935	4.98534	0.879765	19.9413	1910.73	128.389	22.6569	513.557	2575.34
Bioturbated early Oligocene siltstones	48.7805	41.1765	3.44333	6.59971	597.886	504.686	42.2037	80.8905	1225.67
Bioturbated early Oligocene siltstones	47.1805	35.1504	7.14286	10.5263	336.223	250.493	50.9024	75.014	712.633
Bioturbated early Oligocene siltstones	40.5024	38.1476	11.303	10.0471	461.381	434.557	128.758	114.451	1139.15
Bioturbated early Oligocene siltstones	55.7596	27.8798	7.34558	9.01503	644.307	322.154	84.8788	104.169	1155.51
Bioturbated early Oligocene siltstones	55.6989	27.5269	6.45161	10.3226	486.439	240.402	56.3443	90.1509	873.337
Bioturbated early Oligocene siltstones	22.5806	49.1315	10.9181	17.3697	152.948	332.788	73.953	117.652	677.342
Grey silty clays diatom ooze	1.2987	61.6883	37.013	0	3.19943	151.973	91.1838	0	246.356
Grey silty clays diatom ooze	3.65854	92.6829	3.65854	0	3.16336	80.1384	3.16336	0	86.4651
Grey silty clays diatom ooze	1.38889	81.9444	5.55556	11.1111	6.25808	369.227	25.0323	50.0647	450.582
Grey silty clays diatom ooze	42.8571	57.1429	0	0	10.7556	14.3408	0	0	25.0965
Grey silty clays diatom ooze	4.44444	93.3333	2.22222	0	5.92694	124.466	2.96347	0	133.356
Grey silty clays diatom ooze	0	0	0	0	0	0	0	0	0
Grey silty clays diatom ooze	0	91.2281	5.26316	3.50877	0	167.499	9.66339	6.44226	183.604
Grey silty clays diatom ooze	0	0	0	0	0	0	0	0	0
Grey silty clays diatom ooze	40.7407	38.8889	20.3704	0	64.9535	62.001	32.4767	0	159.431
Grey silty clays diatom ooze	0.192678	5.78035	93.8343	0.192678	3.57539	107.262	1741.21	3.57539	1855.63
Grey silty clays diatom ooze	3.7037	14.8148	81.1728	0.308642	69.7649	279.06	1529.01	5.81375	1883.65
Grey silty clays diatom ooze	0.217391	20.2174	79.5652	0	4.83223	449.398	1768.6	0	2222.83
Grey silty clays diatom ooze	0.465116	8.95349	90.5814	0	8.67918	167.074	1690.27	0	1866.02
F2	4.21687	87.9518	5.42169	2.40964	138.913	2897.32	178.602	79.3788	3294.22
F2	3.79747	91.1392	5.06329	0	7.38997	177.359	9.8533	0	194.603
F2	12.5	87.5	0	0	8.68404	60.7883	0	0	69.4723
F2	0	0	0	0	0	0	0	0	0
F2	0	100	0	0	0	17.2617	0	0	17.2617
F2	0	100	0	0	0	47.946	0	0	47.946
F2	0	0	0	0	0	0	0	0	0
F2	0.4329	1.7316	97.4026	0.4329	8.44475	33.779	1900.07	8.44475	1950.74
F2	2.6178	8.63874	86.3874	2.35602	27.7453	91.5596	915.596	24.9708	1059.87
F2	2.08333	20.8333	70.8333	6.25	10.082	100.82	342.787	30.2459	483.934
F2	5.26316	7.89474	85.7895	1.05263	56.7327	85.0991	924.743	11.3465	1077.92
F2	3.44828	58.6207	37.931	0	3.02153	51.3659	33.2368	0	87.6242
F2	8.43373	68.6747	1.20482	21.6867	24.862	202.448	3.55172	63.9309	294.792
F2	5.35714	55.3571	33.0357	6.25	13.1753	136.145	81.248	15.3712	245.94
F2	2.27273	82.9545	1.13636	13.6364	9.73858	355.458	4.86929	58.4315	428.497
F2	37.8378	43.2432	5.40541	13.5135	30.3857	34.7265	4.34081	10.852	80.3049
F2	11.4286	78.0952	0.952381	9.52381	40.2509	275.048	3.35424	33.5424	352.195
F2	100	0	0	0	13.0966	0	0	0	13.0966
F2	19.6429	46.4286	21.4286	12.5	44.9239	106.184	49.0079	28.5879	228.703
F2	93.3333	6.66667	0	0	89.0107	6.35791	0	0	95.3686
F2	5.69395	75.089	6.40569	12.8114	22.9085	302.106	25.7721	51.5442	402.331
F2	6.14334	67.2355	24.9147	1.70648	89.7723	982.508	364.077	24.9367	1461.29
F2	8.88889	76.8889	12.8889	1.33333	103.167	892.393	149.592	15.475	1160.63
F2	5.55556	68.9542	21.8954	3.59477	60.0752	745.639	236.767	38.8722	1081.35
F2	4.87805	67.7507	23.3062	4.06504	75.0177	1041.91	358.418	62.5148	1537.86
F2	6.33333	74.6667	17.6667	1.33333	86.2545	1016.89	240.605	18.1588	1361.91
F2	4.2042	72.0721	21.6216	2.1021	69.2917	1187.86	356.357	34.6459	1648.15
F2	7.23861	76.1394	13.4048	3.21716	66.7652	702.271	123.639	29.6734	922.349
F2	4.89796	86.1224	1.63265	7.34694	92.8324	1632.3	30.9441	139.249	1895.33
F2	6.46766	64.9254	28.3582	0.248756	79.8416	801.487	350.075	3.07083	1234.47
F2	2.76923	77.8462	18.1538	1.23077	40.459	1137.35	265.232	17.9818	1461.02
F2	4.14013	77.707	16.242	1.91083	36.9778	694.045	145.067	17.0667	893.156
F2	3.58566	72.1116	1.99203	22.3108	30.4758	612.902	16.931	189.627	849.936
F2	4.29799	20.9169	70.2006	4.58453	22.0436	107.279	360.045	23.5132	512.881
F2	0	0	0	0	0	0	0	0	0
F2	32.8125	12.5	51.5625	3.125	35.7217	13.6083	56.1341	3.40207	108.866
F2	30.7692	51.9231	15.3846	1.92308	24.6661	41.624	12.333	1.54163	80.1647
F2	1.00671	87.9195	10.0671	1.00671	24.108	2105.43	241.08	24.108	2394.73
F2	0.318471	77.0701	21.3376	1.27389	8.36539	2024.42	560.481	33.4616	2626.73
F2	1.14504	89.313	8.01527	1.52672	15.6272	1218.92	109.39	20.8362	1364.77
F2	2.4055	83.1615	13.7457	0.687285	26.7884	926.112	153.076	7.65382	1113.63
F2	2.6178	84.8168	9.68586	2.87958	56.0654	1816.52	207.442	61.672	2141.7
F2	0.793651	92.0635	3.96825	3.1746	7.26006	842.167	36.3003	29.0402	914.767
F2	8.94737	53.6842	32.1053	5.26316	129.272	775.63	463.857	76.0422	1444.8
F2	3.54839	68.3871	21.2903	6.77419	30.5746	589.256	183.448	58.3697	861.648
F2	1.91388	65.5502	19.1388	13.3971	16.1989	554.813	161.989	113.392	846.393
F2	9.71922	57.8834	23.3261	9.07127	109.426	651.695	262.623	102.131	1125.88
F2	6.93069	70.297	14.8515	7.92079	44.6219	452.594	95.6184	50.9965	643.831
F2	6.09929	66.383	13.3333	14.1844	58.6141	637.939	128.133	136.312	960.998
F2	4.84848	67.8788	10.9091	16.3636	27.7509	388.512	62.4394	93.6591	572.361
F2	5.40541	73.5135	6.48649	14.5946	22.3823	304.399	26.8588	60.4322	414.072
F2	2	68.6667	8.66667	20.6667	6.35534	218.2	27.5398	65.6719	317.767
F2	13.6201	62.0072	2.86738	21.5054	46.3424	210.98	9.7563	73.1723	340.251
F2	3.34728	53.1381	12.5523	30.9623	11.7105	185.904	43.9144	108.322	349.851
average	16.8363	51.0521	20.8147	5.80249	181.588	446.969	228.136	47.4484	904.141
17% percentile	0.857569	10.0174	1.33317	0	6.02628	58.9386	3.78844	0	116.213
83% percentile	40.6692	80.7897	33.9155	12.718	123.318	793.73	347.888	88.9724	1549.53

## Sheet: slumps
Lithology	rel reworked dinos	rel in situ dinos	rel Acritarchs	rel pollen	abs reworked dinos	abs in situ dinos	abs Acritarchs	abs pollen	abs total
EOT slumps	31.3692	43.3276	9.35875	15.9445	212.791	293.91	63.4846	108.159	678.344
EOT slumps	51.6129	20.7373	5.06912	22.5806	333.672	134.065	32.7713	145.981	646.489
EOT slumps	5.35714	67.8571	3.57143	23.2143	6.72654	85.2028	4.48436	29.1483	125.562
EOT slumps	42.6808	26.9841	14.8148	15.5203	302.104	191	104.863	109.856	707.822
EOT slumps	63.047	24.3112	3.24149	9.40032	428.772	165.336	22.0448	63.93	680.083
EOT slumps	67.4041	19.0265	2.65487	10.9145	1613.71	455.512	63.5598	261.301	2394.08
EOT slumps	37.8906	32.8125	15.2344	14.0625	363.771	315.019	146.259	135.008	960.056
EOT slumps	70.3509	6.14035	15.7895	7.7193	2186.06	190.803	490.637	239.867	3107.37
EOT slumps	85.5586	6.26703	2.17984	5.99455	5018.36	367.587	127.856	351.604	5865.4
EOT slumps	72.3104	16.7549	2.46914	8.46561	591.162	136.977	20.186	69.2092	817.534
EOT slumps	66.8648	23.0312	1.48588	8.61813	1049.24	361.405	23.3165	135.236	1569.2
Orange slumps	25	75	0	0	4.24966	12.749	0	0	16.9987
Orange slumps	0.813008	88.6179	0	10.5691	2.99278	326.213	0	38.9061	368.112
Orange slumps	5.52147	73.6196	7.36196	13.4969	31.1981	415.975	41.5975	76.262	565.032
Orange slumps	0	66.6667	33.3333	0	0	45.203	22.6015	0	67.8045
Orange slumps	14.6341	68.2927	11.3821	5.69106	39.0401	182.187	30.3645	15.1822	266.774
Orange slumps	8.19672	13.1148	77.0492	1.63934	19.7888	31.662	186.015	3.95776	241.423
Orange slumps	2.57235	55.627	33.119	8.68167	38.4808	832.147	495.44	129.873	1495.94
Orange slumps	1.62338	70.1299	25.974	2.27273	12.2023	527.138	195.236	17.0832	751.659
Orange slumps	1.81269	67.3716	27.7946	3.02115	14.3016	531.541	219.291	23.8359	788.969
Orange slumps	10.8434	68.6747	20.4819	0	15.4522	97.864	29.1875	0	142.504
Orange slumps	4.9505	81.1881	8.91089	4.9505	23.6481	387.828	42.5665	23.6481	477.691
Orange slumps	1.75439	80.7018	15.7895	1.75439	11.1734	513.977	100.561	11.1734	636.885
Orange slumps	2.8125	64.375	28.4375	4.375	16.0243	366.779	162.024	24.9267	569.753
Orange slumps	3.31754	91.4692	1.89573	3.31754	29.9165	824.84	17.0951	29.9165	901.768
Orange slumps	0.917431	73.3945	17.4312	8.25688	1.43896	115.117	27.3403	12.9507	156.847
Orange slumps	1.96078	73.5294	22.0588	2.45098	19.1057	716.464	214.939	23.8821	974.391
Orange slumps	1.03359	74.9354	18.6047	5.42636	12.8742	933.383	231.736	67.5898	1245.58
Orange slumps	0.917431	77.0642	13.7615	8.25688	10.0105	840.878	150.157	90.0941	1091.14
Orange slumps	3.42679	81.6199	11.215	3.73832	31.2585	744.52	102.3	34.1001	912.179
Orange slumps	0	71.1538	5.12821	23.7179	0	247.903	17.8669	82.6344	348.405
Orange slumps	1.2987	75.974	5.19481	17.5325	3.6667	214.502	14.6668	49.5005	282.336
Orange slumps	0	79.5918	8.16327	12.2449	0	180.181	18.4801	27.7201	226.381
Orange slumps	2.0202	85.8586	9.42761	2.6936	22.7227	965.713	106.039	30.2969	1124.77
Orange slumps	1.62602	71.8157	20.5962	5.96206	16.0141	707.287	202.845	58.7182	984.864
Orange slumps	2.88714	61.1549	31.2336	4.72441	24.7473	524.192	267.721	40.4955	857.156
Orange slumps	22.0513	67.1795	6.15385	4.61538	143.528	437.261	40.0544	30.0408	650.884
Orange slumps	10.3774	78.3019	5.34591	5.97484	103.163	778.413	53.1446	59.3969	994.117
Orange slumps	1.40845	74.6479	11.7371	12.2066	5.00326	265.173	41.6939	43.3616	355.232
Orange slumps	0.847458	88.1356	6.77966	4.23729	3.29557	342.739	26.3645	16.4778	388.877
Orange slumps	0	61.086	28.5068	10.4072	0	179.786	83.9001	30.6302	294.316
Orange slumps	5.76923	68.8462	21.5385	3.84615	73.6663	879.084	275.021	49.1109	1276.88
Orange slumps	4.60123	66.8712	24.8466	3.68098	47.2336	686.462	255.062	37.7869	1026.54
Orange slumps	9.27835	74.2268	9.96564	6.52921	84.8607	678.885	91.1466	59.7168	914.609
Orange slumps	3.0303	82.5758	4.92424	9.4697	18.5785	506.264	30.1901	58.0578	613.091
Orange slumps	3.84615	65.0888	24.2604	6.80473	23.9254	404.892	150.914	42.3296	622.061
Orange slumps	0.892857	82.4405	14.5833	2.08333	17.2885	1596.31	282.379	40.3399	1936.31
Orange slumps	6.06061	79.798	10.6061	3.53535	87.2448	1148.72	152.678	50.8928	1439.54
Orange slumps	7.09877	80.8642	10.1852	1.85185	85.1992	970.53	122.242	22.2259	1200.2
Orange slumps	2.2082	80.1262	14.1956	3.47003	37.153	1348.12	238.841	58.3833	1682.5
Orange slumps	3.1746	71.746	20.3175	4.7619	45.5593	1029.64	291.58	68.339	1435.12
Orange slumps	1.87668	75.067	19.8391	3.21716	18.4737	738.946	195.293	31.6691	984.382
Orange slumps	1.05263	84.9123	11.2281	2.80702	13.7695	1110.74	146.874	36.7186	1308.1
Orange slumps	1.9544	78.5016	10.0977	9.44625	24.2746	975.03	125.419	117.327	1242.05
Orange slumps	3.37838	81.7568	11.4865	3.37838	33.2736	805.22	113.13	33.2736	984.898
Orange slumps	6.22837	77.1626	15.2249	1.38408	33.4842	414.832	81.8502	7.44093	537.607
Orange slumps	2.38095	88.0952	6.80272	2.72109	30.8034	1139.73	88.0098	35.2039	1293.74
Orange slumps	4.42177	82.6531	9.52381	3.40136	32.1699	601.33	69.2891	24.7461	727.535
Orange slumps	4.22961	69.1843	21.4502	5.13595	32.5038	531.669	164.841	39.4689	768.483
Orange slumps	3.15457	82.3344	11.6719	2.83912	21.2986	555.893	78.8047	19.1687	675.164
Orange slumps	2.80374	75.0779	19.3146	2.80374	20.5313	549.783	141.438	20.5313	732.284
Orange slumps	7.97342	72.4252	13.289	6.31229	50.202	456.001	83.67	39.7432	629.617
Orange slumps	22.561	64.0244	8.53659	4.87805	154.042	437.145	58.2861	33.3063	682.779
Orange slumps	0	100	0	0	0	18.8783	0	0	18.8783
Orange slumps	13.2353	62.2549	8.82353	15.6863	100.982	474.988	67.3211	119.682	762.973
Orange slumps	1.97368	79.6053	13.1579	5.26316	22.2644	897.995	148.429	59.3716	1128.06
Orange slumps	16.8103	58.1897	4.74138	20.2586	286.227	990.786	80.7307	344.94	1702.68
Orange slumps	9.23913	61.9565	14.6739	14.1304	66.0813	443.134	104.953	101.066	715.233
Orange slumps	9.92908	71.6312	12.766	5.67376	47.3216	341.392	60.8421	27.0409	476.597
Orange slumps	1.74419	74.4186	17.4419	6.39535	21.2785	907.882	212.785	78.0211	1219.97
Orange slumps	4.40252	65.4088	26.4151	3.77358	43.5413	646.899	261.248	37.3211	989.01
Orange slumps	0	77.2727	5.68182	17.0455	0	218.448	16.0623	48.187	282.697
Orange slumps	10.0295	53.3923	7.07965	29.4985	43.9391	233.911	31.0158	129.233	438.099
Orange slumps	2.13904	52.9412	1.06952	43.8503	4.60617	114.003	2.30309	94.4265	215.339
Red slumps	10	83.3333	0	6.66667	13.364	111.366	0	8.90931	133.64
Red slumps	0	0	0	0	0	0	0	0	0
Red slumps	19.0476	80.9524	0	0	29.6825	126.15	0	0	155.833
Red slumps	1.19048	53.5714	17.8571	27.381	3.39511	152.78	50.9266	78.0875	285.189
Red slumps	1.07527	88.172	10.7527	0	2.47778	203.178	24.7778	0	230.433
Red slumps	0	0	0	0	0	0	0	0	0
average	11.7233	64.9303	13.0386	7.80789	180.405	492.918	106.738	59.9253	839.986
17% percentile	1.04178	53.1352	3.38336	2.34938	3.91738	143.772	19.2136	15.7394	252.324
83% percentile	18.0856	81.6979	21.083	13.8193	102.225	862.656	199.597	98.2108	1244.06

## Sheet: debris flows
Lithology	rel reworked dinos	rel in situ dinos	rel Acritarchs	rel pollen	abs reworked dinos	abs in situ dinos	abs Acritarchs	abs pollen	abs total
pink	14.966	31.2925	46.2585	7.48299	45.2617	94.6381	139.9	22.6309	302.43
pink	27.2414	32.069	36.8966	3.7931	96.8416	114.003	131.165	13.4843	355.494
pink	20	10	68.8889	1.11111	44.4376	22.2188	153.063	2.46875	222.188
Pink	0	63.8596	33.3333	2.80702	0	334.507	174.606	14.7036	523.817
Pink	4.87805	75.6098	7.31707	12.1951	20.8095	322.548	31.2143	52.0238	426.595
Pink	0	72.7273	18.1818	9.09091	0	148.652	37.1629	18.5815	204.396
Pink	0	73.1343	19.403	7.46269	0	89.7593	23.8137	9.15911	122.732
Pink	5	33.4615	58.8462	2.69231	17.9378	120.045	211.114	9.65882	358.756
Pink	0	37.1429	52.8571	10	0	53.5139	76.1544	14.4076	144.076
Pink	0.369004	8.30258	91.1439	0.184502	3.10243	69.8047	766.3	1.55122	840.759
Pink	2.7972	26.9231	66.4336	3.84615	13.3147	128.154	316.225	18.3078	476.002
pink	2.28571	61.7143	33.7143	2.28571	6.40571	172.954	94.4842	6.40571	280.25
Pink	7.89474	80.7018	0	11.4035	15.5935	159.401	0	22.524	197.518
Pink	0	0	0	0	0	0	0	0	0
Brown	10.7843	37.2549	28.4314	23.5294	18.5949	64.2371	49.023	40.5708	172.426
Brown	0	73.3333	26.6667	0	0	42.8067	15.5661	0	58.3727
Brown	2.30415	36.8664	41.4747	19.3548	7.93599	126.976	142.848	66.6623	344.422
Brown	8.69565	77.0186	14.2857	0	10.6415	94.2534	17.4825	0	122.377
Brown	3.46535	27.2277	52.9703	16.3366	17.7454	139.428	271.252	83.657	512.082
Brown	0.193175	7.08307	90.0193	2.70444	2.72726	99.9996	1270.9	38.1817	1411.81
Brown	0.42735	14.2094	82.0513	3.31197	5.47468	182.033	1051.14	42.4287	1281.07
Brown	10.2167	21.6718	68.1115	0	30.7764	65.2832	205.176	0	301.236
Brown	0.0833333	4.66667	94.9167	0.333333	1.17746	65.9375	1341.12	4.70982	1412.95
Brown	0.501505	3.51053	93.1795	2.80843	4.51676	31.6173	839.213	25.2938	900.641
Brown	0	3.94958	94.2857	1.76471	0	61.0462	1457.32	27.276	1545.64
Brown	0.157895	5.47368	90.2105	4.15789	1.73814	60.2555	993.057	45.771	1100.82
Brown	0.273224	27.3224	51.9126	20.4918	0.894902	89.4902	170.031	67.1176	327.534
Brown	1.15274	13.5447	63.9769	21.3256	5.44694	64.0015	302.305	100.768	472.522
Brown	0.304569	22.2335	72.3858	5.07614	2.51724	183.759	598.265	41.9541	826.495
Brown	0.257954	21.3242	74.1187	4.29923	2.6258	217.066	754.478	43.7633	1017.93
Brown	0.26178	16.0995	80.6283	3.01047	2.14157	131.707	659.604	24.6281	818.08
Brown	1.68067	26.0504	63.8655	8.40336	5.39418	83.6099	204.979	26.9709	320.954
Brown	0.124146	5.27623	92.1788	2.42086	1.95038	82.8911	1448.16	38.0324	1571.03
Brown	0.395127	4.05005	95.0115	0.543299	15.6864	160.785	3771.92	21.5687	3969.96
Brown	0.216294	4.18169	95.3136	0.288392	5.60091	108.284	2468.13	7.46788	2589.49
Brown	0.534442	6.26485	92.2209	0.97981	13.1227	153.827	2264.39	24.0582	2455.4
Brown	1.88917	8.12343	87.9723	2.01511	23.0865	99.2718	1075.06	24.6256	1222.04
Brown	0.147348	4.96071	94.8919	0	2.4048	80.9617	1548.69	0	1632.06
Brown	0.128783	10.8178	87.1861	1.86735	1.14607	96.2695	775.886	16.6179	889.92
Brown	0.189609	5.27114	93.4016	1.13766	5.72439	159.138	2819.83	34.3463	3019.04
Brown	0	21.6667	67.7778	10.5556	0	68.4918	214.256	33.3678	316.116
Brown	0.142857	20.2857	63.1429	16.4286	0.464328	65.9345	205.233	53.3977	325.029
Brown	0	37.2	34	28.8	0	94.5639	86.4294	73.2108	254.204
Brown	0	22.9885	29.8851	47.1264	0	59.4498	77.2848	121.872	258.607
Brown	0	0	0	0	0	0	0	0	0
Brown	0.738007	80.8118	15.4982	2.95203	4.83364	529.284	101.506	19.3346	654.959
Brown	4.05405	73.6486	16.8919	5.40541	32.6874	593.82	136.197	43.5831	806.288
Brown	0	80.8696	15.2174	3.91304	0	376.012	70.7549	18.1941	464.961
Brown	23.913	40.5797	31.1594	4.34783	50.0856	84.9937	65.263	9.10647	209.449
brown	0.740741	71.1111	25.9259	2.22222	1.1851	113.77	41.4787	3.55531	159.989
Brown	0	75.6757	21.6216	2.7027	0	235.886	67.396	8.4245	311.706
average	3.12561	31.7561	54.4326	6.76411	10.6281	133.281	583.075	28.1652	755.15
17% percentile	0	5.27368	18.7924	0.438316	0	62.5239	45.2508	4.13257	200.957
83% percentile	4.93902	72.9308	91.6613	11.7993	18.2664	177.494	1172.98	44.7671	1346.44
