# Supplementary material for: Paleoceanography and ice sheet variability offshore Wilkes Land, Antarctica – Part 2: Insights from Oligocene–Miocene dinoflagellate cyst assemblages
Source: Copernicus journal article supplement (doi:10.5194/cp-14-1015-2018), 2018-07-11
Supplement: Supplementary file [file cp-14-1015-2018-supplement-title-page.pdf › cp-14-1015-2018-supplement-title-page.pdf]

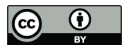

## *Supplement of*

# **Paleoceanography and ice sheet variability offshore Wilkes Land, Antarctica – Part 2: Insights from Oligocene–Miocene dinoflagellate cyst assemblages**

**Peter K. Bijl et al.**

*Correspondence to:* Peter K. Bijl ([p.k.bijl@uu.nl](mailto:p.k.bijl@uu.nl))

- [cp-14-1015-2018-supplement-title-page.pdf](#)
- Supplementary datasets
  - [Raw counts.xls](#)
  - [dino ecogroups per lithology.xls](#)
  - [palynological groups per lithology.xls](#)

The copyright of individual parts of the supplement might differ from the CC BY 4.0 License.
